# Supplementary material for: Association of Triglyceride-Glucose Index and Its Derivatives With Incidence and Cause-Specific Mortality of Cardiovascular and Cerebrovascular Diseases Among Cancer Survivors
Source: Research Square preprint supplement (doi:10.21203/rs.3.rs-7625609/v1), 2025-10-22
Supplement: Supplementary file 1 [file d77e9861fc10b2455ed2a91b.docx]

**Supplementary Table 1 Relationship between TyG Index and overall survival**

| **Group** | **Characteristic** | HR1 (95% CI1) | ***P*-value** | P for trend |
| --- | --- | --- | --- | --- |
| **Model 1** | **TyG-WHtR Index** |  |  |  |
|  | Q1 (0-25%) | Reference |  | 4.98 (3.98, 6.00)  < 0.001 |
|  | Q2 (25-50%) | 1.15 (1.05, 1.27) | 0.002 |  |
|  | Q3 (50-75%) | 1.17 (1.07, 1.29) | < 0.001 |  |
|  | Q4 (75-100%) | 1.38 (1.26, 1.51) | < 0.001 |  |
| **Model 2** | **TyG-WHtR Index** |  |  |  |
|  | Q1 (0-25%) | Reference |  | 3.99 (3.20,4.99)  < 0.001 |
|  | Q2 (25-50%) | 1.08 (0.99, 1.19) | 0.089 |  |
|  | Q3 (50-75%) | 1.06 (0.96, 1.16) | 0.259 |  |
|  | Q4 (75-100%) | 1.21 (1.10, 1.32) | < 0.001 |  |
| **Model 3** | **TyG-WHtR Index** |  |  |  |
|  | Q1 (0-25%) | Reference |  | 3.65 (2.91, 4.58)  < 0.001 |
|  | Q2 (25-50%) | 1.07 (0.97, 1.17) | 0.182 |  |
|  | Q3 (50-75%) | 1.03 (0.93, 1.13) | 0.602 |  |
|  | Q4 (75-100%) | 1.15 (1.05, 1.26) | 0.003 |  |
| **Model 4** | **TyG-WHtR Index** |  |  |  |
|  | Q1 (0-25%) | Reference |  | 2.37 (1.85, 3.04)  < 0.001 |
|  | Q2 (25-50%) | 1.06 (0.96, 1.16) | 0.233 |  |
|  | Q3 (50-75%) | 1.01 (0.92, 1.11) | 0.792 |  |
|  | Q4 (75-100%) | 1.10 (1.01, 1.21) | 0.038 |  |
|  |  |  |  |  |

1HR = Hazard Ratio, CI = Confidence Interval

Model 1: Unadjusted model.

Model 2: Adjusted for Age, Sex, Ethnicity, Education level.

Model 3: Adjusted for Age, Sex, Ethnicity, Education level, Townsend deprivation index, Alcohol consumption, Smoking status.

Model 4: Adjusted for Age, Sex, Ethnicity, Education level, Townsend deprivation index, Alcohol consumption, Smoking status, diabetes history, and hypertension history.

**Supplementary Table 2** **Relationship between TyG-BMI Index and overall survival**

| **Group** | **Characteristic** | HR1 (95% CI1) | ***P*-value** | P for trend |
| --- | --- | --- | --- | --- |
| **Model 1** | **TyG-BMI Index** |  |  |  |
|  | Q1 (0-25%) | Reference |  | 2.02 (1.70, 2.39)  < 0.001 |
|  | Q2 (25-50%) | 1.01 (0.92, 1.10) | 0.906 |  |
|  | Q3 (50-75%) | 1.10 (1.01, 1.21) | 0.037 |  |
|  | Q4 (75-100%) | 1.25 (1.15, 1.37) | < 0.001 |  |
| **Model 2** | **TyG-WHtR Index** |  |  |  |
|  | Q1 (0-25%) | Reference |  | 1.56 (1.32, 1.86)  < 0.001 |
|  | Q2 (25-50%) | 0.89 (0.81, 0.98) | 0.020 |  |
|  | Q3 (50-75%) | 0.94 (0.86, 1.03) | 0.217 |  |
|  | Q4 (75-100%) | 1.10 (1.01, 1.20) | 0.035 |  |
| **Model 3** | **TyG-WHtR Index** |  |  |  |
|  | Q1 (0-25%) | Reference |  | 1.41 (1.19, 1.68)  < 0.001 |
|  | Q2 (25-50%) | 0.89 (0.81, 0.98) | 0.018 |  |
|  | Q3 (50-75%) | 0.93 (0.85, 1.02) | 0.147 |  |
|  | Q4 (75-100%) | 1.07 (0.98, 1.17) | 0.125 |  |
| **Model 4** | **TyG-WHtR Index** |  |  |  |
|  | Q1 (0-25%) | Reference |  | 1.28 (1.07, 1.53)  0.007 |
|  | Q2 (25-50%) | 0.89 (0.81, 0.98) | 0.015 |  |
|  | Q3 (50-75%) | 0.92 (0.84, 1.01) | 0.080 |  |
|  | Q4 (75-100%) | 1.02 (0.92, 1.12) | 0.741 |  |
|  |  |  |  |  |

1HR = Hazard Ratio, CI = Confidence Interval

Model 1: Unadjusted model.

Model 2: Adjusted for Age, Sex, Ethnicity, Education level.

Model 3: Adjusted for Age, Sex, Ethnicity, Education level, Townsend deprivation index, Alcohol consumption, Smoking status.

Model 4: Adjusted for Age, Sex, Ethnicity, Education level, Townsend deprivation index, Alcohol consumption, Smoking status, diabetes history, and hypertension history.

**Supplementary Table 3** **Relationship between TyG-WC Index and overall survival**

| **Group** | **Characteristic** | HR1 (95% CI1) | ***P*-value** | P for trend |
| --- | --- | --- | --- | --- |
| **Model 1** | **TyG-WHtR Index** |  |  |  |
|  | Q1 (0-25%) | Reference |  | 1.16 (1.13, 1.18)  < 0.001 |
|  | Q2 (25-50%) | 1.26 (1.14, 1.39) | < 0.001 |  |
|  | Q3 (50-75%) | 1.40 (1.28, 1.55) | < 0.001 |  |
|  | Q4 (75-100%) | 1.75 (1.59, 1.91) | < 0.001 |  |
| **Model 2** | **TyG-WHtR Index** |  |  |  |
|  | Q1 (0-25%) | Reference |  | 1.09 (1.06, 1.12)  < 0.001 |
|  | Q2 (25-50%) | 1.07 (0.97, 1.19) | 0.165 |  |
|  | Q3 (50-75%) | 1.09 (0.99, 1.21) | 0.079 |  |
|  | Q4 (75-100%) | 1.31 (1.18, 1.44) | < 0.001 |  |
| **Model 3** | **TyG-WHtR Index** |  |  |  |
|  | Q1 (0-25%) | Reference |  | 1.08 (1.05, 1.10)  < 0.001 |
|  | Q2 (25-50%) | 1.06 (0.96, 1.17) | 0.249 |  |
|  | Q3 (50-75%) | 1.06 (0.96, 1.17) | 0.261 |  |
|  | Q4 (75-100%) | 1.26 (1.14, 1.39) | < 0.001 |  |
| **Model 4** | **TyG-WHtR Index** |  |  |  |
|  | Q1 (0-25%) | Reference |  | 1.07 (1.04, 1.09)  < 0.001 |
|  | Q2 (25-50%) | 1.06 (0.96, 1.17) | 0.274 |  |
|  | Q3 (50-75%) | 1.04 (0.94, 1.16) | 0.411 |  |
|  | Q4 (75-100%) | 1.20 (1.08, 1.34) | < 0.001 |  |
|  |  |  |  |  |

1HR = Hazard Ratio, CI = Confidence Interval

Model 1: Unadjusted model.

Model 2: Adjusted for Age, Sex, Ethnicity, Education level.

Model 3: Adjusted for Age, Sex, Ethnicity, Education level, Townsend deprivation index, Alcohol consumption, Smoking status.

Model 4: Adjusted for Age, Sex, Ethnicity, Education level, Townsend deprivation index, Alcohol consumption, Smoking status, diabetes history, and hypertension history.

**Supplementary Table 4** **Relationship between TyG-WHtR Index and overall survival**

| **Group** | **Characteristic** | HR1 (95% CI1) | ***P*-value** | P for trend |
| --- | --- | --- | --- | --- |
| **Model 1** | **TyG-WHtR Index** |  |  |  |
|  | Q1 (0-25%) | Reference |  | 2.03 (1.82, 2.27)  < 0.001 |
|  | Q2 (25-50%) | 1.20 (1.09, 1.32) | < 0.001 |  |
|  | Q3 (50-75%) | 1.35 (1.23, 1.49) | < 0.001 |  |
|  | Q4 (75-100%) | 1.64 (1.50, 1.80) | < 0.001 |  |
| **Model 2** | **TyG-WHtR Index** |  |  |  |
|  | Q1 (0-25%) | Reference |  | 1.62 (1.44, 1.82)  < 0.001 |
|  | Q2 (25-50%) | 1.04 (0.95, 1.15) | 0.398 |  |
|  | Q3 (50-75%) | 1.09 (0.99, 1.20) | 0.077 |  |
|  | Q4 (75-100%) | 1.32 (1.20, 1.45) | < 0.001 |  |
| **Model 3** | **TyG-WHtR Index** |  |  |  |
|  | Q1 (0-25%) | Reference |  | 1.53 (1.36, 1.72)  < 0.001 |
|  | Q2 (25-50%) | 1.03 (0.94, 1.14) | 0.515 |  |
|  | Q3 (50-75%) | 1.06 (0,.96, 1.17) | 0.235 |  |
|  | Q4 (75-100%) | 1.26 (1.15, 1.39) | < 0.001 |  |
| **Model 4** | **TyG-WHtR Index** |  |  |  |
|  | Q1 (0-25%) | Reference |  | 1.44 (1.27, 1.64)  < 0.001 |
|  | Q2 (25-50%) | 1.04 (0.94, 1.14) | 0.489 |  |
|  | Q3 (50-75%) | 1.05 (0.95, 1.16) | 0.328 |  |
|  | Q4 (75-100%) | 1.21 (1.10, 1.34) | <0.001 |  |
|  |  |  |  |  |

1HR = Hazard Ratio, CI = Confidence Interval

Model 1: Unadjusted model.

Model 2: Adjusted for Age, Sex, Ethnicity, Education level.

Model 3: Adjusted for Age, Sex, Ethnicity, Education level, Townsend deprivation index, Alcohol consumption, Smoking status.

Model 4: Adjusted for Age, Sex, Ethnicity, Education level, Townsend deprivation index, Alcohol consumption, Smoking status, diabetes history, and hypertension history.

**Supplementary Table 5 Relationship between TyG Index and CVVD risk**

| **Group** | **Characteristic** | HR1 (95% CI1) | ***P*-value** | P for trend |
| --- | --- | --- | --- | --- |
| **Model 1** | **TyG Index** |  |  |  |
|  | Q1 (0-25%) | Reference |  | 6.82 (4.99, 9.33)  < 0.001 |
|  | Q2 (25-50%) | 1.21 (1.08, 1.35) | < 0.001 |  |
|  | Q3 (50-75%) | 1.48 (1.33, 1.64) | < 0.001 |  |
|  | Q4 (75-100%) | 1.73 (1.56, 1.92) | < 0.001 |  |
| **Model 2** | **TyG Index** |  |  |  |
|  | Q1 (0-25%) | Reference |  | 3.74 (2.71, 5.16)  < 0.001 |
|  | Q2 (25-50%) | 1.10 (0.98, 1.23) | 0.094 |  |
|  | Q3 (50-75%) | 1.25 (1.12, 1.39) | < 0.001 |  |
|  | Q4 (75-100%) | 1.42 (1.28, 1.58) | < 0.001 |  |
| **Model 3** | **TyG Index** |  |  |  |
|  | Q1 (0-25%) | Reference |  | 3.20 (2.31, 4.42)  < 0.001 |
|  | Q2 (25-50%) | 1.08 (0.97, 1.21) | 0.170 |  |
|  | Q3 (50-75%) | 1.21 (1.09, 1.35) | < 0.001 |  |
|  | Q4 (75-100%) | 1.36 (1.23, 1.51) | < 0.001 |  |
| **Model 4** | **TyG Index** |  |  |  |
|  | Q1 (0-25%) | Reference |  | 1.54 (1.11. 2.15)  0.011 |
|  | Q2 (25-50%) | 1.04 (0.93, 1.16) | 0.523 |  |
|  | Q3 (50-75%) | 1.12 (1.01, 1.25) | 0.038 |  |
|  | Q4 (75-100%) | 1.14 (1.02, 1.27) | 0.019 |  |
|  |  |  |  |  |

1HR = Hazard Ratio, CI = Confidence Interval

Model 1: Unadjusted model.

Model 2: Adjusted for Age, Sex, Ethnicity, Education level.

Model 3: Adjusted for Age, Sex, Ethnicity, Education level, Townsend deprivation index, Alcohol consumption, Smoking status.

Model 4: Adjusted for Age, Sex, Ethnicity, Education level, Townsend deprivation index, Alcohol consumption, Smoking status, diabetes history, and hypertension history.

**Supplementary Table 6** **Relationship between TyG Index and CVVD specific mortality**

| **Group** | **Characteristic** | HR1 (95% CI1) | ***P*-value** | P for trend |
| --- | --- | --- | --- | --- |
| **Model 1** | **TyG Index** |  |  |  |
|  | Q1 (0-25%) | Reference |  | 5.52 (2.67,11.4)  < 0.001 |
|  | Q2 (25-50%) | 1.48 (0.92, 2.37) | 0.107 |  |
|  | Q3 (50-75%) | 2.17 (1.40, 3.38) | < 0.001 |  |
|  | Q4 (75-100%) | 2.13 (1.37, 3.32) | < 0.001 |  |
| **Model 2** | **TyG Index** |  |  |  |
|  | Q1 (0-25%) | Reference |  | 3.42 (1.61, 7.52)  0.001 |
|  | Q2 (25-50%) | 1.30 (0.81, 2.08) | 0.281 |  |
|  | Q3 (50-75%) | 1.73 (1.11, 2.69) | 0.016 |  |
|  | Q4 (75-100%) | 1.63 (1.04, 2.54) | 0.033 |  |
| **Model 3** | **TyG Index** |  |  |  |
|  | Q1 (0-25%) | Reference |  | 3.07 (1.44, 6.52)  0.004 |
|  | Q2 (25-50%) | 1.28 (0.80, 2.05) | 0.311 |  |
|  | Q3 (50-75%) | 1.66 (1.06, 2.58) | 0.025 |  |
|  | Q4 (75-100%) | 1.55 (0.99, 2.42) | 0.055 |  |
| **Model 4** | **TyG Index** |  |  |  |
|  | Q1 (0-25%) | Reference |  | 2.07 (0.95. 4.51)  0.067 |
|  | Q2 (25-50%) | 1.21 (0.76, 1.95) | 0.423 |  |
|  | Q3 (50-75%) | 1.52 (0.98, 2.38) | 0.064 |  |
|  | Q4 (75-100%) | 1.30 (0.83, 2.06) | 0.254 |  |
|  |  |  |  |  |

1HR = Hazard Ratio, CI = Confidence Interval

Model 1: Unadjusted model.

Model 2: Adjusted for Age, Sex, Ethnicity, Education level.

Model 3: Adjusted for Age, Sex, Ethnicity, Education level, Townsend deprivation index, Alcohol consumption, Smoking status.

Model 4: Adjusted for Age, Sex, Ethnicity, Education level, Townsend deprivation index, Alcohol consumption, Smoking status, diabetes history, and hypertension history.

**Supplementary Table 7** **Relationship between TyG-BMI Index and CVVD Risk**

| **Group** | **Characteristic** | HR1 (95% CI1) | ***P*-value** | P for trend |
| --- | --- | --- | --- | --- |
| **Model 1** | **TyG-BMI Index** |  |  |  |
|  | Q1 (0-25%) | Reference |  | 1.76 (1.66, 1.88)  < 0.001 |
|  | Q2 (25-50%) | 1.30 (1.16, 1.45) | < 0.001 |  |
|  | Q3 (50-75%) | 1.50 (1.35, 1.68) | < 0.001 |  |
|  | Q4 (75-100%) | 2.12 (1.91, 2.36) | < 0.001 |  |
| **Model 2** | **TyG-BMI Index** |  |  |  |
|  | Q1 (0-25%) | Reference |  | 1.74 (1.63,1.87)  < 0.001 |
|  | Q2 (25-50%) | 1.08 (0.96, 1.21) | 0.204 |  |
|  | Q3 (50-75%) | 1.19 (1.06, 1.33) | 0.003 |  |
|  | Q4 (75-100%) | 1.79 (1.61, 1.99) | < 0.001 |  |
| **Model 3** | **TyG-BMI Index** |  |  |  |
|  | Q1 (0-25%) | Reference |  | 1.69 (1.58, 1.82)  < 0.001 |
|  | Q2 (25-50%) | 1.06 (0.95, 1.19) | 0.318 |  |
|  | Q3 (50-75%) | 1.16 (1.03, 1.30) | 0.011 |  |
|  | Q4 (75-100%) | 1.72 (1.54, 1.91) | < 0.001 |  |
| **Model 4** | **TyG-BMI Index** |  |  |  |
|  | Q1 (0-25%) | Reference |  | 1.41 (1.30, 1.52  < 0.001 |
|  | Q2 (25-50%) | 1.01 (0.90, 1.13) | 0.899 |  |
|  | Q3 (50-75%) | 1.04 (0.93, 1.17) | 0.487 |  |
|  | Q4 (75-100%) | 1.35 (1.21, 1.51) | < 0.001 |  |
|  |  |  |  |  |

1HR = Hazard Ratio, CI = Confidence Interval

Model 1: Unadjusted model.

Model 2: Adjusted for Age, Sex, Ethnicity, Education level.

Model 3: Adjusted for Age, Sex, Ethnicity, Education level, Townsend deprivation index, Alcohol consumption, Smoking status.

Model 4: Adjusted for Age, Sex, Ethnicity, Education level, Townsend deprivation index, Alcohol consumption, Smoking status, diabetes history, and hypertension history.

**Supplementary Table 8** **Relationship between TyG-BMI Index and CVVD mortality**

| **Group** | **Characteristic** | HR1 (95% CI1) | ***P*-value** | P for trend |
| --- | --- | --- | --- | --- |
| **Model 1** | **TyG-BMI Index** |  |  |  |
|  | Q1 (0-25%) | Reference |  | 2.19 (1.74, 2.76)  < 0.001 |
|  | Q2 (25-50%) | 3.06 (1.77,5.30) | < 0.001 |  |
|  | Q3 (50-75%) | 3.03 (1.75, 5.24) | < 0.001 |  |
|  | Q4 (75-100%) | 4.35 (2.56, 7.38) | < 0.001 |  |
| **Model 2** | **TyG-BMI Index** |  |  |  |
|  | Q1 (0-25%) | Reference |  | 2.27 (1.75, 2.95)  < 0.001 |
|  | Q2 (25-50%) | 2.32 (1.34, 4.03) | 0.003 |  |
|  | Q3 (50-75%) | 2.12 (1.22, 3.68) | 0.008 |  |
|  | Q4 (75-100%) | 3.35 (1.97, 5.69) | < 0.001 |  |
| **Model 3** | **TyG-BMI Index** |  |  |  |
|  | Q1 (0-25%) | Reference |  | 2.22 (1.71, 2.89)  < 0.001 |
|  | Q2 (25-50%) | 2.29 (1.32, 3.98) | 0.003 |  |
|  | Q3 (50-75%) | 2.09 (1.20, 3.64) | 0.009 |  |
|  | Q4 (75-100%) | 3.22 (1.89, 5.50) | < 0.001 |  |
| **Model 4** | **TyG-BMI Index** |  |  |  |
|  | Q1 (0-25%) | Reference |  | 1.93 (1.45, 2.58)  < 0.001 |
|  | Q2 (25-50%) | 2.19 (1.26, 3.80) | 0.006 |  |
|  | Q3 (50-75%) | 1.88 (1.08, 3.29) | 0.026 |  |
|  | Q4 (75-100%) | 2.59 (1.49, 4.50) | < 0.001 |  |
|  |  |  |  |  |

1HR = Hazard Ratio, CI = Confidence Interval

Model 1: Unadjusted model.

Model 2: Adjusted for Age, Sex, Ethnicity, Education level.

Model 3: Adjusted for Age, Sex, Ethnicity, Education level, Townsend deprivation index, Alcohol consumption, Smoking status.

Model 4: Adjusted for Age, Sex, Ethnicity, Education level, Townsend deprivation index, Alcohol consumption, Smoking status, diabetes history, and hypertension history.

**Supplementary Table 9** **Relationship between TyG-WC Index and CVVD risk**

| **Group** | **Characteristic** | HR1 (95% CI1) | ***P*-value** | P for trend |
| --- | --- | --- | --- | --- |
| **Model 1** | **TyG-WC Index** |  |  |  |
|  | Q1 (0-25%) | Reference |  | 1.24 (1.21, 1.28)  < 0.001 |
|  | Q2 (25-50%) | 1.47 (1.31, 1.67) | < 0.001 |  |
|  | Q3 (50-75%) | 1.95 (1.95, 2.19) | < 0.001 |  |
|  | Q4 (75-100%) | 2.98 (2.67, 3.32) | < 0.001 |  |
| **Model 2** | **TyG-WC Index** |  |  |  |
|  | Q1 (0-25%) | Reference |  | 1.24 (1.21, 1.28)  < 0.001 |
|  | Q2 (25-50%) | 1.17 (1.03, 1.32) | 0.015 |  |
|  | Q3 (50-75%) | 1.36 (1.21, 1.54) | < 0.001 |  |
|  | Q4 (75-100%) | 2.01 (1.78, 2.26) | < 0.001 |  |
| **Model 3** | **TyG-WC Index** |  |  |  |
|  | Q1 (0-25%) | Reference |  | 1.23 (1.20, 1.26)  < 0.001 |
|  | Q2 (25-50%) | 1.14 (1.01, 1.29) | 0.036 |  |
|  | Q3 (50-75%) | 1.31 (1.16, 1.48) | < 0.001 |  |
|  | Q4 (75-100%) | 1.91 (1.70, 2.16) | < 0.001 |  |
| **Model 4** | **TyG-WC Index** |  |  |  |
|  | Q1 (0-25%) | Reference |  | 1.15 (1.12, 1.17)  < 0.001 |
|  | Q2 (25-50%) | 1.09 (0.96, 1.23) | 0.181 |  |
|  | Q3 (50-75%) | 1.17 (1.03, 1.32) | 0.015 |  |
|  | Q4 (75-100%) | 1.51 (1.33, 1.71) | < 0.001 |  |
|  |  |  |  |  |

1HR = Hazard Ratio, CI = Confidence Interval

Model 1: Unadjusted model.

Model 2: Adjusted for Age, Sex, Ethnicity, Education level.

Model 3: Adjusted for Age, Sex, Ethnicity, Education level, Townsend deprivation index, Alcohol consumption, Smoking status.

Model 4: Adjusted for Age, Sex, Ethnicity, Education level, Townsend deprivation index, Alcohol consumption, Smoking status, diabetes history, and hypertension history.

**Supplementary Table 10** **Relationship between TyG-WC Index and CVVD mortality**

| **Group** | **Characteristic** | HR1 (95% CI1) | ***P*-value** | P for trend |
| --- | --- | --- | --- | --- |
| **Model 1** | **TyG-WC Index** |  |  |  |
|  | Q1 (0-25%) | Reference |  | 1.51 (1.39, 1.65)  < 0.001 |
|  | Q2 (25-50%) | 1.70 (0.97, 2.96) | 0.062 |  |
|  | Q3 (50-75%) | 2.81 (1.69, 4.70) | < 0.001 |  |
|  | Q4 (75-100%) | 4.58 (2.82, 7.46) | < 0.001 |  |
| **Model 2** | **TyG-WC Index** |  |  |  |
|  | Q1 (0-25%) | Reference |  | 1.38 (1.25, 1.53)  < 0.001 |
|  | Q2 (25-50%) | 1.11 (0.63, 1.97) | 0.707 |  |
|  | Q3 (50-75%) | 1.50 (0.87, 2.57) | 0.142 |  |
|  | Q4 (75-100%) | 2.26 (1.33, 3.82) | 0.002 |  |
| **Model 3** | **TyG-WC Index** |  |  |  |
|  | Q1 (0-25%) | Reference |  | 1.36 (1.23, 1.51)  < 0.001 |
|  | Q2 (25-50%) | 1.09 (0.62, 1.92) | 0.768 |  |
|  | Q3 (50-75%) | 1.42 (0.83, 2.45) | 0.202 |  |
|  | Q4 (75-100%) | 2.14 (1.26, 3.63) | 0.005 |  |
| **Model 4** | **TyG-WC Index** |  |  |  |
|  | Q1 (0-25%) | Reference |  | 1.30 (1.16, 1.45)  < 0.001 |
|  | Q2 (25-50%) | 1.03 (0.59, 1.83) | 0.908 |  |
|  | Q3 (50-75%) | 1.26 (0.73, 2.17) | 0.411 |  |
|  | Q4 (75-100%) | 1.71 (0.99, 2.95) | 0.054 |  |
|  |  |  |  |  |

1HR = Hazard Ratio, CI = Confidence Interval

Model 1: Unadjusted model.

Model 2: Adjusted for Age, Sex, Ethnicity, Education level.

Model 3: Adjusted for Age, Sex, Ethnicity, Education level, Townsend deprivation index, Alcohol consumption, Smoking status.

Model 4: Adjusted for Age, Sex, Ethnicity, Education level, Townsend deprivation index, Alcohol consumption, Smoking status, diabetes history, and hypertension history.

**Supplementary Table 11** **Relationship between TyG-WHtR Index and CVVD risk**

| **Group** | **Characteristic** | HR1 (95% CI1) | ***P*-value** | P for trend |
| --- | --- | --- | --- | --- |
| **Model 1** | **TyG-WHtR Index** |  |  |  |
|  | Q1 (0-25%) | Reference |  | 3.87 (3.43, 4.36)  < 0.001 |
|  | Q2 (25-50%) | 1.70 (0.97, 2.96) | 0.062 |  |
|  | Q3 (50-75%) | 2.81 (1.69, 4.70) | < 0.001 |  |
|  | Q4 (75-100%) | 4.58 (2.82, 7.46) | < 0.001 |  |
| **Model 2** | **TyG-WHtR Index** |  |  |  |
|  | Q1 (0-25%) | Reference |  | 3.08 (2.71, 3.51)  < 0.001 |
|  | Q2 (25-50%) | 1.11 (0.63, 1.97) | 0.707 |  |
|  | Q3 (50-75%) | 1.50 (0.87, 2.57) | 0.142 |  |
|  | Q4 (75-100%) | 2.26 (1.33, 3.82) | 0.002 |  |
| **Model 3** | **TyG-WHtR Index** |  |  |  |
|  | Q1 (0-25%) | Reference |  | 2.88 (2.52, 3.28)  < 0.001 |
|  | Q2 (25-50%) | 1.09 (0.62, 1.92) | 0.768 |  |
|  | Q3 (50-75%) | 1.42 (0.83, 2.45) | 0.202 |  |
|  | Q4 (75-100%) | 2.14 (1.26, 3.63) | 0.005 |  |
| **Model 4** | **TyG-WHtR Index** |  |  |  |
|  | Q1 (0-25%) | Reference |  | 2.04 (1.77, 2.35)  < 0.001 |
|  | Q2 (25-50%) | 1.03 (0.59, 1.83) | 0.908 |  |
|  | Q3 (50-75%) | 1.26 (0.73, 2.17) | 0.411 |  |
|  | Q4 (75-100%) | 1.71 (0.99, 2.95) | 0.054 |  |
|  |  |  |  |  |

1HR = Hazard Ratio, CI = Confidence Interval

Model 1: Unadjusted model.

Model 2: Adjusted for Age, Sex, Ethnicity, Education level.

Model 3: Adjusted for Age, Sex, Ethnicity, Education level, Townsend deprivation index, Alcohol consumption, Smoking status.

Model 4: Adjusted for Age, Sex, Ethnicity, Education level, Townsend deprivation index, Alcohol consumption, Smoking status, diabetes history, and hypertension history.

**Supplementary Table 12** **Relationship between TyG-WHtR Index and CVVD mortality**

| **Group** | **Characteristic** | HR1 (95% CI1) | ***P*-value** | P for trend |
| --- | --- | --- | --- | --- |
| **Model 1** | **TyG-WHtR Index** |  |  |  |
|  | Q1 (0-25%) | Reference |  | 7.42 (1.39, 1.65)  < 0.001 |
|  | Q2 (25-50%) | 3.59 (1.94, 6.65) | < 0.001 |  |
|  | Q3 (50-75%) | 4.00 (2.17, 7.36) | < 0.001 |  |
|  | Q4 (75-100%) | 6.79 (3.78, 12.2) | < 0.001 |  |
| **Model 2** | **TyG-WHtR Index** |  |  |  |
|  | Q1 (0-25%) | Reference |  | 5.84 (3.55, 9.61)  < 0.001 |
|  | Q2 (25-50%) | 2.57 (1.38, 4.77) | 0.003 |  |
|  | Q3 (50-75%) | 2.41 (1.30, 4.47) | 0.005 |  |
|  | Q4 (75-100%) | 4.15 (2.29, 7.51) | < 0.001 |  |
| **Model 3** | **TyG-WHtR Index** |  |  |  |
|  | Q1 (0-25%) | Reference |  | 5.46 (3.29, 9.06)  < 0.001 |
|  | Q2 (25-50%) | 2.50 (1.35, 4.65) | 0.004 |  |
|  | Q3 (50-75%) | 2.30 (1.23, 4.27) | 0.009 |  |
|  | Q4 (75-100%) | 3.88 (2.14, 7.05) | < 0.001 |  |
| **Model 4** | **TyG-WHtR Index** |  |  |  |
|  | Q1 (0-25%) | Reference |  | 4.35 (2.50, 7.56)  < 0.001 |
|  | Q2 (25-50%) | 2.39 (1.29, 4.46) | 0.006 |  |
|  | Q3 (50-75%) | 2.07 (1.11, 3.87) | 0.022 |  |
|  | Q4 (75-100%) | 3.17 (1.72, 5.85) | < 0.001 |  |
|  |  |  |  |  |

1HR = Hazard Ratio, CI = Confidence Interval

Model 1: Unadjusted model.

Model 2: Adjusted for Age, Sex, Ethnicity, Education level.

Model 3: Adjusted for Age, Sex, Ethnicity, Education level, Townsend deprivation index, Alcohol consumption, Smoking status.

Model 4: Adjusted for Age, Sex, Ethnicity, Education level, Townsend deprivation index, Alcohol consumption, Smoking status, diabetes history, and hypertension history.

**Supplementary Table 13** **Relationship between TyG Index and CVD event risk**

| **Group** | **Characteristic** | HR1 (95% CI1) | ***P*-value** | P for trend |
| --- | --- | --- | --- | --- |
| **Model 1** | **TyG Index** |  |  |  |
|  | Q1 (0-25%) | Reference |  | 3.20 (2.64, 3.88)  < 0.001 |
|  | Q2 (25-50%) | 1.21 (1.08, 1.35) | 0.001 |  |
|  | Q3 (50-75%) | 1.47 (1.32, 1.64) | < 0.001 |  |
|  | Q4 (75-100%) | 1.72 (1.54, 1.91) | < 0.001 |  |
| **Model 2** | **TyG Index** |  |  |  |
|  | Q1 (0-25%) | Reference |  | 2.22 (1.92, 2.71)  < 0.001 |
|  | Q2 (25-50%) | 1.09 (0.98, 1.23) | 0.118 |  |
|  | Q3 (50-75%) | 1.25 (1.12, 1.40) | < 0.001 |  |
|  | Q4 (75-100%) | 1.41 (1.27, 1.57) | < 0.001 |  |
| **Model 3** | **TyG Index** |  |  |  |
|  | Q1 (0-25%) | Reference |  | 2.02 (1.66, 2.47)  < 0.001 |
|  | Q2 (25-50%) | 1.08 (0.96, 1.21) | 0.211 |  |
|  | Q3 (50-75%) | 1.21 (1.08, 1.35) | < 0.001 |  |
|  | Q4 (75-100%) | 1.35 (1.21, 1.51) | < 0.001 |  |
| **Model 4** | **TyG Index** |  |  |  |
|  | Q1 (0-25%) | Reference |  | 1.31 (1.06. 1.60)  0.010 |
|  | Q2 (25-50%) | 1.05 (0.94, 1.18) | 0.373 |  |
|  | Q3 (50-75%) | 1.16 (1.04, 1.29) | 0.010 |  |
|  | Q4 (75-100%) | 1.18 (1.05, 1.31) | 0.004 |  |
|  |  |  |  |  |

1HR = Hazard Ratio, CI = Confidence Interval

Model 1: Unadjusted model.

Model 2: Adjusted for Age, Sex, Ethnicity, Education level.

Model 3: Adjusted for Age, Sex, Ethnicity, Education level, Townsend deprivation index, Alcohol consumption, Smoking status.

Model 4: Adjusted for Age, Sex, Ethnicity, Education level, Townsend deprivation index, Alcohol consumption, Smoking status, diabetes history, and hypertension history.

**Supplementary Table 14** **Relationship between TyG Index and CVD specific mortality**

| **Group** | **Characteristic** | HR1 (95% CI1) | ***P*-value** | P for trend |
| --- | --- | --- | --- | --- |
| **Model 1** | **TyG Index** |  |  |  |
|  | Q1 (0-25%) | Reference |  | 8.11 (3.60,18.3)  < 0.001 |
|  | Q2 (25-50%) | 1.68 (0.96, 2.02) | 0.068 |  |
|  | Q3 (50-75%) | 2.39 (1.42, 4.03) | < 0.001 |  |
|  | Q4 (75-100%) | 2.55 (1.52,4.30) | < 0.001 |  |
| **Model 2** | **TyG Index** |  |  |  |
|  | Q1 (0-25%) | Reference |  | 4.82 (2.08, 11.2)  < 0.001 |
|  | Q2 (25-50%) | 1.47 (0.84, 2.56) | 0.177 |  |
|  | Q3 (50-75%) | 1.86 (1.10, 3.14) | 0.021 |  |
|  | Q4 (75-100%) | 1.89 (1.12, 3.19) | 0.017 |  |
| **Model 3** | **TyG Index** |  |  |  |
|  | Q1 (0-25%) | Reference |  | 4.20 (1.81, 9.77)  < 0.001 |
|  | Q2 (25-50%) | 1.44 (0.83, 2.51) | 0.199 |  |
|  | Q3 (50-75%) | 1.77 (1.04, 2.99) | 0.034 |  |
|  | Q4 (75-100%) | 1.78 (1.06, 3.01) | 0.030 |  |
| **Model 4** | **TyG Index** |  |  |  |
|  | Q1 (0-25%) | Reference |  | 2.74 (1.15. 6.55)  0.023 |
|  | Q2 (25-50%) | 1.37 (0.78, 2.39) | 0.269 |  |
|  | Q3 (50-75%) | 1.62 (0.96, 2.75) | 0.073 |  |
|  | Q4 (75-100%) | 1.48 (0.87 2.53) | 0.148 |  |
|  |  |  |  |  |

1HR = Hazard Ratio, CI = Confidence Interval

Model 1: Unadjusted model.

Model 2: Adjusted for Age, Sex, Ethnicity, Education level.

Model 3: Adjusted for Age, Sex, Ethnicity, Education level, Townsend deprivation index, Alcohol consumption, Smoking status.

Model 4: Adjusted for Age, Sex, Ethnicity, Education level, Townsend deprivation index, Alcohol consumption, Smoking status, diabetes history, and hypertension history.

**Supplementary Table 15** **Relationship between TyG-BMI Index and CVD Risk**

| **Group** | **Characteristic** | HR1 (95% CI1) | ***P*-value** | P for trend |
| --- | --- | --- | --- | --- |
| **Model 1** | **TyG-BMI Index** |  |  |  |
|  | Q1 (0-25%) | Reference |  | 1.79 (1.68, 1.91)  < 0.001 |
|  | Q2 (25-50%) | 1.30 (1.16, 1.46) | < 0.001 |  |
|  | Q3 (50-75%) | 1.51 (1.35, 1.70) | < 0.001 |  |
|  | Q4 (75-100%) | 2.15 (1.93, 2.39) | < 0.001 |  |
| **Model 2** | **TyG-BMI Index** |  |  |  |
|  | Q1 (0-25%) | Reference |  | 1.77 (1.65,1.90)  < 0.001 |
|  | Q2 (25-50%) | 1.08 (0.96, 1.22) | 0.187 |  |
|  | Q3 (50-75%) | 1.20 (1.07, 1.34) | 0.002 |  |
|  | Q4 (75-100%) | 1.81 (1.63, 2.02) | < 0.001 |  |
| **Model 3** | **TyG-BMI Index** |  |  |  |
|  | Q1 (0-25%) | Reference |  | 1.72 (1.60, 1.84)  < 0.001 |
|  | Q2 (25-50%) | 1.06 (0.95, 1.20) | 0.306 |  |
|  | Q3 (50-75%) | 1.16 (1.04, 1.31) | 0.010 |  |
|  | Q4 (75-100%) | 1.73 (1.55, 1.93) | < 0.001 |  |
| **Model 4** | **TyG-BMI Index** |  |  |  |
|  | Q1 (0-25%) | Reference |  | 1.43 (1.32, 1.54  < 0.001 |
|  | Q2 (25-50%) | 1.02 (0.90, 1.14) | 0.798 |  |
|  | Q3 (50-75%) | 1.05 (0.93, 1.18) | 0.457 |  |
|  | Q4 (75-100%) | 1.36 (1.22, 1.53) | < 0.001 |  |
|  |  |  |  |  |

1HR = Hazard Ratio, CI = Confidence Interval

Model 1: Unadjusted model.

Model 2: Adjusted for Age, Sex, Ethnicity, Education level.

Model 3: Adjusted for Age, Sex, Ethnicity, Education level, Townsend deprivation index, Alcohol consumption, Smoking status.

Model 4: Adjusted for Age, Sex, Ethnicity, Education level, Townsend deprivation index, Alcohol consumption, Smoking status, diabetes history, and hypertension history.

**Supplementary Table 16** **Relationship between TyG-BMI Index and CVD mortality**

| **Group** | **Characteristic** | HR1 (95% CI1) | ***P*-value** | P for trend |
| --- | --- | --- | --- | --- |
| **Model 1** | **TyG-BMI Index** |  |  |  |
|  | Q1 (0-25%) | Reference |  | 2.42 (1.88, 3.11)  < 0.001 |
|  | Q2 (25-50%) | 1.30 (1.16, 1.46) | < 0.001 |  |
|  | Q3 (50-75%) | 1.51 (1.35, 1.70) | < 0.001 |  |
|  | Q4 (75-100%) | 2.15 (1.93, 2.39) | < 0.001 |  |
| **Model 2** | **TyG-BMI Index** |  |  |  |
|  | Q1 (0-25%) | Reference |  | 2.62 (1.96, 3.49)  < 0.001 |
|  | Q2 (25-50%) | 2.53 (1.29, 4.95) | 0.007 |  |
|  | Q3 (50-75%) | 2.33 (1.19, 4.57) | 0.014 |  |
|  | Q4 (75-100%) | 4.34 (2.28, 8.26) | < 0.001 |  |
| **Model 3** | **TyG-BMI Index** |  |  |  |
|  | Q1 (0-25%) | Reference |  | 2.52 (1.88, 3.38)  < 0.001 |
|  | Q2 (25-50%) | 2.46 (1.25, 4.83) | 0.009 |  |
|  | Q3 (50-75%) | 2.26 (1.15, 4.45) | 0.018 |  |
|  | Q4 (75-100%) | 4.06 (2.12, 7.75) | < 0.001 |  |
| **Model 4** | **TyG-BMI Index** |  |  |  |
|  | Q1 (0-25%) | Reference |  | 2.19 (1.58, 3.03)  < 0.001 |
|  | Q2 (25-50%) | 2.37 (1.20, 4.65) | 0.012 |  |
|  | Q3 (50-75%) | 2.06 (1.04, 4.06) | 0.038 |  |
|  | Q4 (75-100%) | 3.27 (1.68, 6.38) | < 0.001 |  |
|  |  |  |  |  |

1HR = Hazard Ratio, CI = Confidence Interval

Model 1: Unadjusted model.

Model 2: Adjusted for Age, Sex, Ethnicity, Education level.

Model 3: Adjusted for Age, Sex, Ethnicity, Education level, Townsend deprivation index, Alcohol consumption, Smoking status.

Model 4: Adjusted for Age, Sex, Ethnicity, Education level, Townsend deprivation index, Alcohol consumption, Smoking status, diabetes history, and hypertension history.

**Supplementary Table 17 Relationship between TyG-WC Index and CVD risk**

| **Group** | **Characteristic** | HR1 (95% CI1) | ***P*-value** | P for trend |
| --- | --- | --- | --- | --- |
| **Model 1** | **TyG-WC Index** |  |  |  |
|  | Q1 (0-25%) | Reference |  | 1.33 (1.30, 1.37)  < 0.001 |
|  | Q2 (25-50%) | 1.50 (1.32, 1.70) | < 0.001 |  |
|  | Q3 (50-75%) | 1.99 (1.76, 2.24) | < 0.001 |  |
|  | Q4 (75-100%) | 3.03 (2.71, 3.40) | < 0.001 |  |
| **Model 2** | **TyG-WC Index** |  |  |  |
|  | Q1 (0-25%) | Reference |  | 1.25 (1.22, 1.28)  < 0.001 |
|  | Q2 (25-50%) | 1.18 (1.04, 1.35) | 0.009 |  |
|  | Q3 (50-75%) | 1.39 (1.23, 1.58) | < 0.001 |  |
|  | Q4 (75-100%) | 2.04 (1.81, 2.31) | < 0.001 |  |
| **Model 3** | **TyG-WC Index** |  |  |  |
|  | Q1 (0-25%) | Reference |  | 1.23 (1.20, 1.27)  < 0.001 |
|  | Q2 (25-50%) | 1.16 (1.02, 1.32) | 0.023 |  |
|  | Q3 (50-75%) | 1.33 (1.18, 1.51) | < 0.001 |  |
|  | Q4 (75-100%) | 1.94 (1.72, 2.20) | < 0.001 |  |
| **Model 4** | **TyG-WC Index** |  |  |  |
|  | Q1 (0-25%) | Reference |  | 1.15 (1.12, 1.19)  < 0.001 |
|  | Q2 (25-50%) | 1.10 (0.97, 1.26) | 0.130 |  |
|  | Q3 (50-75%) | 1.19 (1.04, 1.35) | 0.009 |  |
|  | Q4 (75-100%) | 1.53 (1.35, 1.74) | < 0.001 |  |
|  |  |  |  |  |

1HR = Hazard Ratio, CI = Confidence Interval

Model 1: Unadjusted model.

Model 2: Adjusted for Age, Sex, Ethnicity, Education level.

Model 3: Adjusted for Age, Sex, Ethnicity, Education level, Townsend deprivation index, Alcohol consumption, Smoking status.

Model 4: Adjusted for Age, Sex, Ethnicity, Education level, Townsend deprivation index, Alcohol consumption, Smoking status, diabetes history, and hypertension history.

**Supplementary Table 18** **Relationship between TyG-WC Index and CVD mortality**

| **Group** | **Characteristic** | HR1 (95% CI1) | ***P*-value** | P for trend |
| --- | --- | --- | --- | --- |
| **Model 1** | **TyG-WC Index** |  |  |  |
|  | Q1 (0-25%) | Reference |  | 1.61 (1.46, 1.78)  < 0.001 |
|  | Q2 (25-50%) | 2.34 (1.15, 4.75) | 0.019 |  |
|  | Q3 (50-75%) | 4.27 (2.21, 8.25) | < 0.001 |  |
|  | Q4 (75-100%) | 6.67 (3.53, 12.6) | < 0.001 |  |
| **Model 2** | **TyG-WC Index** |  |  |  |
|  | Q1 (0-25%) | Reference |  | 1.46 (1.31, 1.64)  < 0.001 |
|  | Q2 (25-50%) | 1.43 (0.70, 2.95) | 0.328 |  |
|  | Q3 (50-75%) | 2.04 (1.03, 4.07) | 0.042 |  |
|  | Q4 (75-100%) | 2.92 (1.48, 5.74) | 0.002 |  |
| **Model 3** | **TyG-WC Index** |  |  |  |
|  | Q1 (0-25%) | Reference |  | 1.44 (1.28, 1.61)  < 0.001 |
|  | Q2 (25-50%) | 1.38 (0.67, 2.85) | 0.377 |  |
|  | Q3 (50-75%) | 1.91 (0.96, 3.80) | 0.067 |  |
|  | Q4 (75-100%) | 2.69 (1.36, 5.31) | 0.004 |  |
| **Model 4** | **TyG-WC Index** |  |  |  |
|  | Q1 (0-25%) | Reference |  | 1.37 (1.21, 1.55)  < 0.001 |
|  | Q2 (25-50%) | 1.32 (0.64, 2.73) | 0.448 |  |
|  | Q3 (50-75%) | 1.69 (0.85, 3.39) | 0.137 |  |
|  | Q4 (75-100%) | 2.12 (1.06, 4.25) | 0.035 |  |
|  |  |  |  |  |

1HR = Hazard Ratio, CI = Confidence Interval

Model 1: Unadjusted model.

Model 2: Adjusted for Age, Sex, Ethnicity, Education level.

Model 3: Adjusted for Age, Sex, Ethnicity, Education level, Townsend deprivation index, Alcohol consumption, Smoking status.

Model 4: Adjusted for Age, Sex, Ethnicity, Education level, Townsend deprivation index, Alcohol consumption, Smoking status, diabetes history, and hypertension history.

**Supplementary Table 19** **Relationship between TyG-WHtR Index and CVD risk**

| **Group** | **Characteristic** | HR1 (95% CI1) | ***P*-value** | P for trend |
| --- | --- | --- | --- | --- |
| **Model 1** | **TyG-WHtR Index** |  |  |  |
|  | Q1 (0-25%) | Reference |  | 3.95 (3.50, 4.47)  < 0.001 |
|  | Q2 (25-50%) | 1.44 (1.28, 1.63) | 0.062 |  |
|  | Q3 (50-75%) | 1.79 (1.59, 2.01) | < 0.001 |  |
|  | Q4 (75-100%) | 2.68 (2.40, 3.00) | < 0.001 |  |
| **Model 2** | **TyG-WHtR Index** |  |  |  |
|  | Q1 (0-25%) | Reference |  | 3.15 (2.76, 3.60)  < 0.001 |
|  | Q2 (25-50%) | 1.16 (1.02, 1.31) | 0.021 |  |
|  | Q3 (50-75%) | 1.29 (1.15,1.46) | < 0.001 |  |
|  | Q4 (75-100%) | 1.97 (1.76, 2.21) | < 0.001 |  |
| **Model 3** | **TyG-WHtR Index** |  |  |  |
|  | Q1 (0-25%) | Reference |  | 2.94 (2.57, 3.37)  < 0.001 |
|  | Q2 (25-50%) | 1.13 (1.00, 1.28) | 0.052 |  |
|  | Q3 (50-75%) | 1.24 (1.10, 1.40) | < 0.001 |  |
|  | Q4 (75-100%) | 1.86 (1.65, 2.08) | < 0.001 |  |
| **Model 4** | **TyG-WHtR Index** |  |  |  |
|  | Q1 (0-25%) | Reference |  | 2.09 (1.81, 2.42)  < 0.001 |
|  | Q2 (25-50%) | 1.09 (0.96, 1.23) | 0.194 |  |
|  | Q3 (50-75%) | 1.11 (0.99, 1.26) | 0.082 |  |
|  | Q4 (75-100%) | 1.48 (1.31,1.66) | < 0.001 |  |
|  |  |  |  |  |

1HR = Hazard Ratio, CI = Confidence Interval

Model 1: Unadjusted model.

Model 2: Adjusted for Age, Sex, Ethnicity, Education level.

Model 3: Adjusted for Age, Sex, Ethnicity, Education level, Townsend deprivation index, Alcohol consumption, Smoking status.

Model 4: Adjusted for Age, Sex, Ethnicity, Education level, Townsend deprivation index, Alcohol consumption, Smoking status, diabetes history, and hypertension history.

**Supplementary Table 20** **Relationship between TyG-WHtR Index and CVD mortality**

| **Group** | **Characteristic** | HR1 (95% CI1) | ***P*-value** | P for trend |
| --- | --- | --- | --- | --- |
| **Model 1** | **TyG-WHtR Index** |  |  |  |
|  | Q1 (0-25%) | Reference |  | 9.89 (6.00, 16.3)  < 0.001 |
|  | Q2 (25-50%) | 4.94 (2.19, 11.1) | < 0.001 |  |
|  | Q3 (50-75%) | 5.94 (2.66, 13.3) | < 0.001 |  |
|  | Q4 (75-100%) | 10.3 (4.75, 22.5) | < 0.001 |  |
| **Model 2** | **TyG-WHtR Index** |  |  |  |
|  | Q1 (0-25%) | Reference |  | 8.16 (4.67, 14.3  < 0.001 |
|  | Q2 (25-50%) | 3.36 (1.48, 7.61) | 0.004 |  |
|  | Q3 (50-75%) | 3.34 (1.49, 7.53) | 0.004 |  |
|  | Q4 (75-100%) | 5.96 (2.72, 13.1) | < 0.001 |  |
| **Model 3** | **TyG-WHtR Index** |  |  |  |
|  | Q1 (0-25%) | Reference |  | 7.38 (4.18, 13.0)  < 0.001 |
|  | Q2 (25-50%) | 3.22 (1.42, 7.30) | 0.005 |  |
|  | Q3 (50-75%) | 3.11 (1.38, 7.01) | 0.006 |  |
|  | Q4 (75-100%) | 5.38 (2.44, 11.9) | < 0.001 |  |
| **Model 4** | **TyG-WHtR Index** |  |  |  |
|  | Q1 (0-25%) | Reference |  | 5.89 (3.15, 11.0)  < 0.001 |
|  | Q2 (25-50%) | 3.12 (1.37, 7.08) | 0.007 |  |
|  | Q3 (50-75%) | 2.83 (1.25, 6.42) | 0.013 |  |
|  | Q4 (75-100%) | 4.39 (1.96, 9.81) | < 0.001 |  |
|  |  |  |  |  |

1HR = Hazard Ratio, CI = Confidence Interval

Model 1: Unadjusted model.

Model 2: Adjusted for Age, Sex, Ethnicity, Education level.

Model 3: Adjusted for Age, Sex, Ethnicity, Education level, Townsend deprivation index, Alcohol consumption, Smoking status.

Model 4: Adjusted for Age, Sex, Ethnicity, Education level, Townsend deprivation index, Alcohol consumption, Smoking status, diabetes history, and hypertension history.

**Supplementary Table 21** **Relationship between TyG Index and heart failure risk**

| **Group** | **Characteristic** | HR1 (95% CI1) | ***P*-value** | P for trend |
| --- | --- | --- | --- | --- |
| **Model 1** | **TyG Index** |  |  |  |
|  | Q1 (0-25%) | Reference |  | 2.67 (1.92, 3.72)  < 0.001 |
|  | Q2 (25-50%) | 1.20 (0.99, 1.45) | 0.059 |  |
|  | Q3 (50-75%) | 1.30 (1.08, 1.57) | 0.005 |  |
|  | Q4 (75-100%) | 1.49 (1.24, 1.78) | < 0.001 |  |
| **Model 2** | **TyG Index** |  |  |  |
|  | Q1 (0-25%) | Reference |  | 1.85 (1.31, 2.61)  < 0.001 |
|  | Q2 (25-50%) | 1.07 (0.89, 1.30) | 0.454 |  |
|  | Q3 (50-75%) | 1.09 (0.90, 1.31) | 0.397 |  |
|  | Q4 (75-100%) | 1.21 (1.01, 1.46) | 0.038 |  |
| **Model 3** | **TyG Index** |  |  |  |
|  | Q1 (0-25%) | Reference |  | 1.63 (1.16, 2.31)  0.005 |
|  | Q2 (25-50%) | 1.05 (0.87, 1.27) | 0.614 |  |
|  | Q3 (50-75%) | 1.04 (0.86, 1.26) | 0.670 |  |
|  | Q4 (75-100%) | 1.14 (0.95, 1.37) | 0.148 |  |
| **Model 4** | **TyG Index** |  |  |  |
|  | Q1 (0-25%) | Reference |  | 0.91 (0.64. 1.29)  0.594 |
|  | Q2 (25-50%) | 0.99 (0.82, 1.20) | 0.924 |  |
|  | Q3 (50-75%) | 0.95 (0.78, 1.14) | 0.556 |  |
|  | Q4 (75-100%) | 0.89 (0.74, 1.08) | 0.238 |  |
|  |  |  |  |  |

1HR = Hazard Ratio, CI = Confidence Interval

Model 1: Unadjusted model.

Model 2: Adjusted for Age, Sex, Ethnicity, Education level.

Model 3: Adjusted for Age, Sex, Ethnicity, Education level, Townsend deprivation index, Alcohol consumption, Smoking status.

Model 4: Adjusted for Age, Sex, Ethnicity, Education level, Townsend deprivation index, Alcohol consumption, Smoking status, diabetes history, and hypertension history.

**Supplementary Table 22** **Relationship between TyG Index and heart failure specific mortality**

| **Group** | **Characteristic** | HR1 (95% CI1) | ***P*-value** | P for trend |
| --- | --- | --- | --- | --- |
| **Model 1** | **TyG Index** |  |  |  |
|  | Q1 (0-25%) | Reference |  | 5.52 (2.67, 11.4)  < 0.001 |
|  | Q2 (25-50%) | 1.01 (0.14, 7.19) | 0.990 |  |
|  | Q3 (50-75%) | 1.52 (0.25, 9.07) | 0.649 |  |
|  | Q4 (75-100%) | 1.03 (0.15, 7.33) | 0.975 |  |
|  |  |  |  |  |

1HR = Hazard Ratio, CI = Confidence Interval

Model 1: Unadjusted model.

**Supplementary Table 23** **Relationship between TyG-BMI Index and heart failure Risk**

| **Group** | **Characteristic** | HR1 (95% CI1) | ***P*-value** | P for trend |
| --- | --- | --- | --- | --- |
| **Model 1** | **TyG-BMI Index** |  |  |  |
|  | Q1 (0-25%) | Reference |  | 2.04 (1.83, 2.26)  < 0.001 |
|  | Q2 (25-50%) | 1.11 (0.90, 1.36) | 0.329 |  |
|  | Q3 (50-75%) | 1.28 (1.05,1.56) | 0.013 |  |
|  | Q4 (75-100%) | 2.19 (1.84, 2.62) | < 0.001 |  |
| **Model 2** | **TyG-BMI Index** |  |  |  |
|  | Q1 (0-25%) | Reference |  | 2.04 (1.82, 2.29)  < 0.001 |
|  | Q2 (25-50%) | 0.92 (0.75, 1.12) | 0.397 |  |
|  | Q3 (50-75%) | 1.00 (0.82, 1.22) | 0.979 |  |
|  | Q4 (75-100%) | 1.84 (1.53, 2.20) | < 0.001 |  |
| **Model 3** | **TyG-BMI Index** |  |  |  |
|  | Q1 (0-25%) | Reference |  | 1.97 (1.75, 2.21)  <0.001 |
|  | Q2 (25-50%) | 0.90 (0.73, 1.100 | 0.295 |  |
|  | Q3 (50-75%) | 0.97 (0.79, 1.18) | 0.742 |  |
|  | Q4 (75-100%) | 1.72 (1.44, 2.07) | < 0.001 |  |
| **Model 4** | **TyG-BMI Index** |  |  |  |
|  | Q1 (0-25%) | Reference |  | 1.58 (1.39, 1.80)  <0.001 |
|  | Q2 (25-50%) | 0.86 (0.70, 1.06) | 0.149 |  |
|  | Q3 (50-75%) | 0.86 (0.70, 1.05) | 0.144 |  |
|  | Q4 (75-100%) | 1.29 (1.0, 1.57) | 0.010 |  |
|  |  |  |  |  |

1HR = Hazard Ratio, CI = Confidence Interval

Model 1: Unadjusted model.

Model 2: Adjusted for Age, Sex, Ethnicity, Education level.

Model 3: Adjusted for Age, Sex, Ethnicity, Education level, Townsend deprivation index, Alcohol consumption, Smoking status.

Model 4: Adjusted for Age, Sex, Ethnicity, Education level, Townsend deprivation index, Alcohol consumption, Smoking status, diabetes history, and hypertension history.

**Supplementary Table 24** **Relationship between TyG-BMI Index and heart failure mortality**

| **Group** | **Characteristic** | HR1 (95% CI1) | ***P*-value** | P for trend |
| --- | --- | --- | --- | --- |
| **Model 1** | **TyG-BMI Index** |  |  |  |
|  | Q1 (0-25%) | Reference |  | 2.19 (1.74, 2.76)  <0.001 |
|  | Q2 (25-50%) | 2.00 (0.18, 22.1) | 0.571 |  |
|  | Q3 (50-75%) | 2.01 (0.18, 22.2) | 0.568 |  |
|  | Q4 (75-100%) | 4.07 (0.45, 36.4) | 0.209 |  |
|  |  |  |  |  |

1HR = Hazard Ratio, CI = Confidence Interval

Model 1: Unadjusted model.

**Supplementary Table 25** **Relationship between TyG-WC Index and heart failure risk**

| **Group** | **Characteristic** | HR1 (95% CI1) | ***P*-value** | P for trend |
| --- | --- | --- | --- | --- |
| **Model 1** | **TyG-WC Index** |  |  |  |
|  | Q1 (0-25%) | Reference |  | 1.38 (1.33, 1.44)  < 0.001 |
|  | Q2 (25-50%) | 1.37 (1.10, 1.71) | 0.004 |  |
|  | Q3 (50-75%) | 1.89 (1.54, 2.32) | < 0.001 |  |
|  | Q4 (75-100%) | 3.04 (2.51, 3.69) | < 0.001 |  |
| **Model 2** | **TyG-WC Index** |  |  |  |
|  | Q1 (0-25%) | Reference |  | 1.32 (1.26, 1.38)  < 0.001 |
|  | Q2 (25-50%) | 1.10 (0.88, 1.37) | 0.422 |  |
|  | Q3 (50-75%) | 1.35 (1.09, 1.67) | 0.007 |  |
|  | Q4 (75-100%) | 2.11 (1.71, 2.61) | < 0.001 |  |
| **Model 3** | **TyG-WC Index** |  |  |  |
|  | Q1 (0-25%) | Reference |  | 1.30 (1.24, 1.36)  < 0.001 |
|  | Q2 (25-50%) | 1.07 (0.86, 1.34) | 0.745 |  |
|  | Q3 (50-75%) | 1.28 (1.03, 1.59) | 0.8026 |  |
|  | Q4 (75-100%) | 1.98 (1.60, 2.44) | < 0.001 |  |
| **Model 4** | **TyG-WC Index** |  |  |  |
|  | Q1 (0-25%) | Reference |  | 1.19 (1.13, 1.25)  < 0.001 |
|  | Q2 (25-50%) | 1.02 (0.81, 1.27) | 0.935 |  |
|  | Q3 (50-75%) | 1.11 (0.89, 1.39) | 0.342 |  |
|  | Q4 (75-100%) | 1.46 (1.17, 1.83) | < 0.001 |  |
|  |  |  |  |  |

1HR = Hazard Ratio, CI = Confidence Interval

Model 1: Unadjusted model.

Model 2: Adjusted for Age, Sex, Ethnicity, Education level.

Model 3: Adjusted for Age, Sex, Ethnicity, Education level, Townsend deprivation index, Alcohol consumption, Smoking status.

Model 4: Adjusted for Age, Sex, Ethnicity, Education level, Townsend deprivation index, Alcohol consumption, Smoking status, diabetes history, and hypertension history.

**Supplementary Table 26** **Relationship between TyG-WC Index and heart failure mortality**

| **Group** | **Characteristic** | HR1 (95% CI1) | ***P*-value** | P for trend |
| --- | --- | --- | --- | --- |
| **Model 1** | **TyG-WC Index** |  |  |  |
|  | Q1 (0-25%) | Reference |  | 1.51 (1.39, 1.65)  < 0.001 |
|  | Q2 (25-50%) | 2.05 (0.19, 22.6) | 0.559 |  |
|  | Q3 (50-75%) | 1.04 (0.06, 16.6) | 0.980 |  |
|  | Q4 (75-100%) | 5.30 (0.62, 45,4) | 0.128 |  |
|  |  |  |  |  |

1HR = Hazard Ratio, CI = Confidence Interval

Model 1: Unadjusted model.

**Supplementary Table 27** **Relationship between TyG-WHtR Index and heart failure risk**

| **Group** | **Characteristic** | HR1 (95% CI1) | ***P*-value** | P for trend |
| --- | --- | --- | --- | --- |
| **Model 1** | **TyG-WHtR Index** |  |  |  |
|  | Q1 (0-25%) | Reference |  | 4.98 (3.98, 6.00)  < 0.001 |
|  | Q2 (25-50%) | 1.29 (1.05, 1.59) | 0.017 |  |
|  | Q3 (50-75%) | 1.45 (1.18, 1.77) | < 0.001 |  |
|  | Q4 (75-100%) | 2.67 (2.22, 3.21) | < 0.001 |  |
| **Model 2** | **TyG-WHtR Index** |  |  |  |
|  | Q1 (0-25%) | Reference |  | 3.99 (3.20,4.99)  < 0.001 |
|  | Q2 (25-50%) | 1.03 (0.83, 1.27) | 0.807 |  |
|  | Q3 (50-75%) | 1.03 (0.84, 1.27) | 0.771 |  |
|  | Q4 (75-100%) | 1.93 (1.60, 2.33) | < 0.001 |  |
| **Model 3** | **TyG-WHtR Index** |  |  |  |
|  | Q1 (0-25%) | Reference |  | 3.65 (2.91, 4.58)  < 0.001 |
|  | Q2 (25-50%) | 1.00 (0.81, 1.24) | 0.986 |  |
|  | Q3 (50-75%) | 0.98 (0.79, 1.20) | 0.825 |  |
|  | Q4 (75-100%) | 1.78 (1.47, 2.16) | < 0.001 |  |
| **Model 4** | **TyG-WHtR Index** |  |  |  |
|  | Q1 (0-25%) | Reference |  | 2.37 (1.85, 3.04)  < 0.001 |
|  | Q2 (25-50%) | 0.97 (0.78, 1.20) | 0.763 |  |
|  | Q3 (50-75%) | 0.87 (0.70, 1.07) | 0.184 |  |
|  | Q4 (75-100%) | 1.34 (1.09, 1.64) | 0.005 |  |
|  |  |  |  |  |

1HR = Hazard Ratio, CI = Confidence Interval

Model 1: Unadjusted model.

Model 2: Adjusted for Age, Sex, Ethnicity, Education level.

Model 3: Adjusted for Age, Sex, Ethnicity, Education level, Townsend deprivation index, Alcohol consumption, Smoking status.

Model 4: Adjusted for Age, Sex, Ethnicity, Education level, Townsend deprivation index, Alcohol consumption, Smoking status, diabetes history, and hypertension history.

**Supplementary Table 28** **Relationship between TyG-WHtR Index and heart failure mortality**

| **Group** | **Characteristic** | HR1 (95% CI1) | ***P*-value** | P for trend |
| --- | --- | --- | --- | --- |
| **Model 1** | **TyG-WHtR Index** |  |  |  |
|  | Q1 (0-25%) | Reference |  | 7.42 (4.74, 11.6)  < 0.001 |
|  | Q2 (25-50%) | 2.02 (0.18, 22.3) | 0.565 |  |
|  | Q3 (50-75%) | 1.03 (0.06, 16.5) | 0.981 |  |
|  | Q4 (75-100%) | 5.23 (0.61, 44.8) | 0.131 |  |
|  |  |  |  |  |

1HR = Hazard Ratio, CI = Confidence Interval

Model 1: Unadjusted model.

**Supplementary Table 29** **Relationship between TyG Index and stroke event risk**

| **Group** | **Characteristic** | HR1 (95% CI1) | ***P*-value** | P for trend |
| --- | --- | --- | --- | --- |
| **Model 1** | **TyG Index** |  |  |  |
|  | Q1 (0-25%) | Reference |  | 2.53 (1.71, 3.75)  < 0.001 |
|  | Q2 (25-50%) | 1.18 (0.94, 1.48) | 0.153 |  |
|  | Q3 (50-75%) | 1.31 (1.05, 1.64) | 0.015 |  |
|  | Q4 (75-100%) | 1.57 (1.27, 1.95) | < 0.001 |  |
| **Model 2** | **TyG Index** |  |  |  |
|  | Q1 (0-25%) | Reference |  | 1.85 (1.23, 2.79)  0.003 |
|  | Q2 (25-50%) | 1.08 (0.86, 1.35) | 0.525 |  |
|  | Q3 (50-75%) | 1.13 (0.90, 1.41) | 0.295 |  |
|  | Q4 (75-100%) | 1.33 (1.07, 1.65) | 0.011 |  |
| **Model 3** | **TyG Index** |  |  |  |
|  | Q1 (0-25%) | Reference |  | 1.75 (1.16, 2.64)  0.008 |
|  | Q2 (25-50%) | 1.06 (0.85, 1.34) | 0.591 |  |
|  | Q3 (50-75%) | 1.11 (0.88, 1.38) | 0.378 |  |
|  | Q4 (75-100%) | 1.29 (1.04, 1.60) | 0.021 |  |
| **Model 4** | **TyG Index** |  |  |  |
|  | Q1 (0-25%) | Reference |  | 1.15 (0.76. 1.75)  0.515 |
|  | Q2 (25-50%) | 1.02 (0.81, 1.28) | 0.863 |  |
|  | Q3 (50-75%) | 1.03 (0.82, 1.28) | 0.821 |  |
|  | Q4 (75-100%) | 1.09 (0.87, 1.36) | 0.464 |  |
|  |  |  |  |  |

1HR = Hazard Ratio, CI = Confidence Interval

Model 1: Unadjusted model.

Model 2: Adjusted for Age, Sex, Ethnicity, Education level.

Model 3: Adjusted for Age, Sex, Ethnicity, Education level, Townsend deprivation index, Alcohol consumption, Smoking status.

Model 4: Adjusted for Age, Sex, Ethnicity, Education level, Townsend deprivation index, Alcohol consumption, Smoking status, diabetes history, and hypertension history.

**Supplementary Table 30** **Relationship between TyG Index and stroke specific mortality**

| **Group** | **Characteristic** | HR1 (95% CI1) | ***P*-value** | P for trend |
| --- | --- | --- | --- | --- |
| **Model 1** | **TyG Index** |  |  |  |
|  | Q1 (0-25%) | Reference |  | 1.34 (0.22, 8.25)  0.753 |
|  | Q2 (25-50%) | 1.02 (0.36, 2.90) | 0.977 |  |
|  | Q3 (50-75%) | 1.74 (0.68, 4.41) | 0.246 |  |
|  | Q4 (75-100%) | 1.19 (0.43,3.28) | 0.739 |  |
| **Model 2** | **TyG Index** |  |  |  |
|  | Q1 (0-25%) | Reference |  | 0.93 (0.14, 6.11)  0.940 |
|  | Q2 (25-50%) | 0.91 (0.32, 2.61) | 0.868 |  |
|  | Q3 (50-75%) | 1.45(0.57, 3.71) | 0.436 |  |
|  | Q4 (75-100%) | 1.00 (0.36, 2.79) | 0.994 |  |
|  |  |  |  |  |

1HR = Hazard Ratio, CI = Confidence Interval

Model 1: Unadjusted model.

Model 2: Adjusted for Age, Sex, Ethnicity, Education level.

**Supplementary Table 31** **Relationship between TyG-BMI Index and stroke Risk**

| **Group** | **Characteristic** | HR1 (95% CI1) | ***P*-value** | P for trend |
| --- | --- | --- | --- | --- |
| **Model 1** | **TyG-BMI Index** |  |  |  |
|  | Q1 (0-25%) | Reference |  | 12.0 (2,87, 49.9)  < 0.001 |
|  | Q2 (25-50%) | 1.25 (1.00, 1.55) | 0.049 |  |
|  | Q3 (50-75%) | 1.21 (0.97 1.51) | 0.088 |  |
|  | Q4 (75-100%) | 1.41 (1.14,1.75) | 0.002 |  |
| **Model 2** | **TyG-BMI Index** |  |  |  |
|  | Q1 (0-25%) | Reference |  | 6.66 (1.44,30.8)  0.015 |
|  | Q2 (25-50%) | 1.06 (0.85, 1.32) | 0.612 |  |
|  | Q3 (50-75%) | 0.98 (0.79, 1.23) | 0.889 |  |
|  | Q4 (75-100%) | 1.20 (0.97,1.49) | 0.101 |  |
| **Model 3** | **TyG-BMI Index** |  |  |  |
|  | Q1 (0-25%) | Reference |  | 5.95 (1.27, 27.9)  0.024 |
|  | Q2 (25-50%) | 1.06 (0.85, 1.32) | 0.613 |  |
|  | Q3 (50-75%) | 0.98 (0.79, 1.23) | 0.873 |  |
|  | Q4 (75-100%) | 1.18 (0.95, 1.47) | 0.132 |  |
| **Model 4** | **TyG-BMI Index** |  |  |  |
|  | Q1 (0-25%) | Reference |  | 0.60 (0.11, 3.20)  0.548 |
|  | Q2 (25-50%) | 1.01 (0.81, 1.26) | 0.939 |  |
|  | Q3 (50-75%) | 0.87 (0.69, 1.09) | 0.235 |  |
|  | Q4 (75-100%) | 0.90 (0.71, 1.13) | 0.362 |  |
|  |  |  |  |  |

1HR = Hazard Ratio, CI = Confidence Interval

Model 1: Unadjusted model.

Model 2: Adjusted for Age, Sex, Ethnicity, Education level.

Model 3: Adjusted for Age, Sex, Ethnicity, Education level, Townsend deprivation index, Alcohol consumption, Smoking status.

Model 4: Adjusted for Age, Sex, Ethnicity, Education level, Townsend deprivation index, Alcohol consumption, Smoking status, diabetes history, and hypertension history.

**Supplementary Table 32** **Relationship between TyG-BMI Index and stroke mortality**

| **Group** | **Characteristic** | HR1 (95% CI1) | ***P*-value** | P for trend |
| --- | --- | --- | --- | --- |
| **Model 1** | **TyG-BMI Index** |  |  |  |
|  | Q1 (0-25%) | Reference |  | 2.49 (0.00, 2,008)  0.789 |
|  | Q2 (25-50%) | 2.40 (0.85, 6.81) | 0.100 |  |
|  | Q3 (50-75%) | 2.21 (0.77, 6.37) | 0.140 |  |
|  | Q4 (75-100%) | 1.23 (0.37, 4.02) | 0.735 |  |
| **Model 2** | **TyG-BMI Index** |  |  |  |
|  | Q1 (0-25%) | Reference |  | 0.85(0.00, 1,177)  0.964 |
|  | Q2 (25-50%) | 2.00 (0.70, 5.73) | 0.194 |  |
|  | Q3 (50-75%) | 1.75 (0.60, 5.08) | 0.307 |  |
|  | Q4 (75-100%) | 1.00 (0.30, 3.31) | 0.994 |  |
|  |  |  |  |  |

1HR = Hazard Ratio, CI = Confidence Interval

Model 1: Unadjusted model.

Model 2: Adjusted for Age, Sex, Ethnicity, Education level.

**Supplementary Table 33** **Relationship between TyG-WC Index and stroke risk**

| **Group** | **Characteristic** | HR1 (95% CI1) | ***P*-value** | P for trend |
| --- | --- | --- | --- | --- |
| **Model 1** | **TyG-WC Index** |  |  |  |
|  | Q1 (0-25%) | Reference |  | 1.20 (1.14, 1.26)  < 0.001 |
|  | Q2 (25-50%) | 1.30 (1.03, 1.64) | 0.029 |  |
|  | Q3 (50-75%) | 1.45 (1.15, 1.83) | 0.001 |  |
|  | Q4 (75-100%) | 1.96 (1.58, 2.44) | < 0.001 |  |
| **Model 2** | **TyG-WC Index** |  |  |  |
|  | Q1 (0-25%) | Reference |  | 1.12 (1.06, 1.19)  < 0.001 |
|  | Q2 (25-50%) | 1.05 (0.82, 1.33) | 0.714 |  |
|  | Q3 (50-75%) | 1.05 (0.82, 1.34) | 0.694 |  |
|  | Q4 (75-100%) | 1.38 (1.08, 1.75) | 0.009 |  |
| **Model 3** | **TyG-WC Index** |  |  |  |
|  | Q1 (0-25%) | Reference |  | 1.12 (1.05, 1.18)  < 0.001 |
|  | Q2 (25-50%) | 1.04 (0.82, 1.32) | 0.745 |  |
|  | Q3 (50-75%) | 1.03 (0.81, 1.31) | 0.805 |  |
|  | Q4 (75-100%) | 1.35 (1.06, 1.71) | 0.014 |  |
| **Model 4** | **TyG-WC Index** |  |  |  |
|  | Q1 (0-25%) | Reference |  | 1.03 (0.97, 1.10)  0.312 |
|  | Q2 (25-50%) | 0.99 (0.78, 1.26) | 0.935 |  |
|  | Q3 (50-75%) | 0.91 0.71, 1.16) | 0.441 |  |
|  | Q4 (75-100%) | 1.04 (0.81, 1.34) | 0.772 |  |
|  |  |  |  |  |

1HR = Hazard Ratio, CI = Confidence Interval

Model 1: Unadjusted model.

Model 2: Adjusted for Age, Sex, Ethnicity, Education level.

Model 3: Adjusted for Age, Sex, Ethnicity, Education level, Townsend deprivation index, Alcohol consumption, Smoking status.

Model 4: Adjusted for Age, Sex, Ethnicity, Education level, Townsend deprivation index, Alcohol consumption, Smoking status, diabetes history, and hypertension history.

**Supplementary Table 34** **Relationship between TyG-WC Index and stroke mortality**

| **Group** | **Characteristic** | HR1 (95% CI1) | ***P*-value** | P for trend |
| --- | --- | --- | --- | --- |
| **Model 1** | **TyG-WC Index** |  |  |  |
|  | Q1 (0-25%) | Reference |  | 3.48 (0.37, 33.0)  0.278 |
|  | Q2 (25-50%) | 0.77 (0.27, 2,22) | 0.629 |  |
|  | Q3 (50-75%) | 1.04 (0.39, 2.77) | 0.935 |  |
|  | Q4 (75-100%) | 1.61 (0.66, 3.94) | 0.298 |  |
| **Model 2** | **TyG-WC Index** |  |  |  |
|  | Q1 (0-25%) | Reference |  | 1.24 (0.09, 17.1)  0.873 |
|  | Q2 (25-50%) | 0.57 (0.19, 1.68) | 0.305 |  |
|  | Q3 (50-75%) | 0.66 (0.23, 1.89) | 0.444 |  |
|  | Q4 (75-100%) | 0.99 (0.36, 2.69) | 0.981 |  |
|  |  |  |  |  |

1HR = Hazard Ratio, CI = Confidence Interval

Model 1: Unadjusted model.

Model 2: Adjusted for Age, Sex, Ethnicity, Education level.

**Supplementary Table 35** **Relationship between TyG-WHtR Index and stroke risk**

| **Group** | **Characteristic** | HR1 (95% CI1) | ***P*-value** | P for trend |
| --- | --- | --- | --- | --- |
| **Model 1** | **TyG-WHtR Index** |  |  |  |
|  | Q1 (0-25%) | Reference |  | 2.43 (1.88, 3.14)  < 0.001 |
|  | Q2 (25-50%) | 1.15 (0.91, 1.44) | 0.236 |  |
|  | Q3 (50-75%) | 1.27 (1.01, 1.59) | 0.040 |  |
|  | Q4 (75-100%) | 1.75 (1.42, 2.17) | < 0.001 |  |
| **Model 2** | **TyG-WHtR Index** |  |  |  |
|  | Q1 (0-25%) | Reference |  | 1.86 (1.41, 2.46)  < 0.001 |
|  | Q2 (25-50%) | 0.94 (0.75, 1.19) | 0.604 |  |
|  | Q3 (50-75%) | 0.94 (0.74, 1.18) | 0.585 |  |
|  | Q4 (75-100%) | 1.31 (1.05, 1.63) | 0.016 |  |
| **Model 3** | **TyG-WHtR Index** |  |  |  |
|  | Q1 (0-25%) | Reference |  | 1.81 (1.37, 2.40)  < 0.001 |
|  | Q2 (25-50%) | 0.94 (0.74, 1.18) | 0.590 |  |
|  | Q3 (50-75%) | 0.93 (0.73, 1.18) | 0.518 |  |
|  | Q4 (75-100%) | 1.28 (1.02, 1.59) | 0.030 |  |
| **Model 4** | **TyG-WHtR Index** |  |  |  |
|  | Q1 (0-25%) | Reference |  | 1.23 (0.91, 1.67)  0.175 |
|  | Q2 (25-50%) | 0.90 (0.71, 1.14) | 0.378 |  |
|  | Q3 (50-75%) | 0.83 (0.65, 1.05) | 0.115 |  |
|  | Q4 (75-100%) | 0.99 (0.79, 1.25) | 0.952 |  |
|  |  |  |  |  |

1HR = Hazard Ratio, CI = Confidence Interval

Model 1: Unadjusted model.

Model 2: Adjusted for Age, Sex, Ethnicity, Education level.

Model 3: Adjusted for Age, Sex, Ethnicity, Education level, Townsend deprivation index, Alcohol consumption, Smoking status.

Model 4: Adjusted for Age, Sex, Ethnicity, Education level, Townsend deprivation index, Alcohol consumption, Smoking status, diabetes history, and hypertension history.

**Supplementary Table 36** **Relationship between TyG-WHtR Index and stroke mortality**

| **Group** | **Characteristic** | HR1 (95% CI1) | ***P*-value** | P for trend |
| --- | --- | --- | --- | --- |
| **Model 1** | **TyG-WHtR Index** |  |  |  |
|  | Q1 (0-25%) | Reference |  | 1.24 (0.09, 17.1)  0.873 |
|  | Q2 (25-50%) | 2.03 (0.69, 5.94) | 0.196 |  |
|  | Q3 (50-75%) | 1.87 (0.63, 5.57) | 0.263 |  |
|  | Q4 (75-100%) | 2.12 (0.72, 6.19) | 0.171 |  |
| **Model 2** | **TyG-WHtR Index** |  |  |  |
|  | Q1 (0-25%) | Reference |  | 1.20 (0.33, 4.37)  0.782 |
|  | Q2 (25-50%) | 1.60 (0.54, 4.74) | 0.394 |  |
|  | Q3 (50-75%) | 1.30 (0.43, 3.98) | 0.645 |  |
|  | Q4 (75-100%) | 1.47 (0.49, 4.40) | 0.496 |  |
|  |  |  |  |  |

1HR = Hazard Ratio, CI = Confidence Interval

Model 1: Unadjusted model.

Model 2: Adjusted for Age, Sex, Ethnicity, Education level.

**Supplementary Table 37** Subgroup analysis of TyG index for CCVD incidence

| **Variable** | **Point Estimate** | **Lower** | **Upper** | **P value** | **P for interaction** |
| --- | --- | --- | --- | --- | --- |
| **Ethnicity** |  |  |  |  | 0.587 |
| Non-White | 1.36 | 1.09 | 1.7 | 0.006 |  |
| White | 1.46 | 1.36 | 1.56 | <0.001 |  |
| **Age** |  |  |  |  | 0.002 |
| <60 | 1.63 | 1.44 | 1.85 | <0.001 |  |
| ≥60 | 1.3 | 1.2 | 1.4 | <0.001 |  |
| **Alcohol use** |  |  |  |  | <0.001 |
| No | 1.03 | 0.84 | 1.26 | 0.807 |  |
| Yes | 1.5 | 1.4 | 1.6 | <0.001 |  |
| **Sex** |  |  |  |  | 0.017 |
| Female | 1.45 | 1.32 | 1.6 | <0.001 |  |
| Male | 1.24 | 1.14 | 1.34 | <0.001 |  |
| **Qualifications** |  |  |  |  | 0.639 |
| A levels/AS levels or equivalent | 1.49 | 1.19 | 1.88 | 0.001 |  |
| College or University degree | 1.47 | 1.3 | 1.67 | <0.001 |  |
| CSEs or equivalent | 1.14 | 0.79 | 1.64 | 0.49 |  |
| None of the above | 1.35 | 1.2 | 1.52 | <0.001 |  |
| NVQ or HND or HNC or equivalent | 1.41 | 1.15 | 1.74 | 0.001 |  |
| O levels/GCSEs or equivalent | 1.4 | 1.2 | 1.62 | <0.001 |  |
| Other professional qualifications eg: nursing, teaching | 1.17 | 0.91 | 1.51 | 0.224 |  |
| **Smoking status** |  |  |  |  | 0.006 |
| No | 1.48 | 1.38 | 1.58 | <0.001 |  |
| Yes | 1.12 | 0.93 | 1.35 | 0.229 |  |
| **Diabetes history** |  |  |  |  | 0.031 |
| No | 1.3 | 1.2 | 1.4 | <0.001 |  |
| Yes | 1.11 | 0.98 | 1.25 | 0.091 |  |
| **Hypertension history** |  |  |  |  | 0.731 |
| No | 1.36 | 1.2 | 1.54 | <0.001 |  |
| Yes | 1.32 | 1.23 | 1.43 | <0.001 |  |

**Supplementary Table 38** Subgroup analysis of TyG-BMI index for CCVD incidence

| **Variable** | **Point Estimate** | **Lower** | **Upper** | **P value** | **P for interaction** |
| --- | --- | --- | --- | --- | --- |
| **Ethnicity** |  |  |  |  | 0.166 |
| Non-White | 1.5 | 1.2 | 1.87 | <0.001 |  |
| White | 1.77 | 1.65 | 1.89 | <0.001 |  |
| **Age** |  |  |  |  | 0.16 |
| <60 | 1.87 | 1.66 | 2.1 | <0.001 |  |
| ≥60 | 1.68 | 1.55 | 1.82 | <0.001 |  |
| **Alcohol use** |  |  |  |  | 0.003 |
| No | 1.32 | 1.09 | 1.6 | 0.004 |  |
| Yes | 1.8 | 1.68 | 1.93 | <0.001 |  |
| **Sex** |  |  |  |  | 0.382 |
| Female | 1.76 | 1.61 | 1.93 | <0.001 |  |
| Male | 1.65 | 1.49 | 1.82 | <0.001 |  |
| **Qualifications** |  |  |  |  | 0.227 |
| A levels/AS levels or equivalent | 1.86 | 1.51 | 2.28 | <0.001 |  |
| College or University degree | 1.67 | 1.46 | 1.91 | <0.001 |  |
| CSEs or equivalent | 1.57 | 1.08 | 2.27 | 0.017 |  |
| None of the above | 1.68 | 1.49 | 1.89 | <0.001 |  |
| NVQ or HND or HNC or equivalent | 1.31 | 1.04 | 1.65 | 0.024 |  |
| O levels/GCSEs or equivalent | 1.81 | 1.56 | 2.1 | <0.001 |  |
| Other professional qualifications eg: nursing, teaching | 1.4 | 1.06 | 1.84 | 0.016 |  |
| **Smoking status** |  |  |  |  | 0.001 |
| No | 1.81 | 1.69 | 1.93 | <0.001 |  |
| Yes | 1.27 | 1.03 | 1.56 | 0.028 |  |
| **Diabetes history** |  |  |  |  | 0.002 |
| No | 1.58 | 1.45 | 1.72 | <0.001 |  |
| Yes | 1.25 | 1.09 | 1.42 | 0.001 |  |
| **Hypertension history** |  |  |  |  | 0.533 |
| No | 1.63 | 1.4 | 1.89 | <0.001 |  |
| Yes | 1.54 | 1.43 | 1.66 | <0.001 |  |

**Supplementary Table 39** Subgroup analysis of TyG-WC index for CCVD incidence

| **Variable** | **Point Estimate** | **Lower** | **Upper** | **P value** | **P for interaction** |
| --- | --- | --- | --- | --- | --- |
| **Ethnicity** |  |  |  |  | 0.464 |
| Non-White | 1.28 | 1.19 | 1.39 | <0.001 |  |
| White | 1.33 | 1.3 | 1.36 | <0.001 |  |
| **Age** |  |  |  |  | 0.132 |
| <60 | 1.35 | 1.29 | 1.41 | <0.001 |  |
| ≥60 | 1.29 | 1.26 | 1.33 | <0.001 |  |
| **Alcohol use** |  |  |  |  | 0.003 |
| No | 1.19 | 1.11 | 1.28 | <0.001 |  |
| Yes | 1.34 | 1.31 | 1.37 | <0.001 |  |
| **Sex** |  |  |  |  | 0.019 |
| Female | 1.29 | 1.24 | 1.34 | <0.001 |  |
| Male | 1.21 | 1.17 | 1.26 | <0.001 |  |
| **Qualifications** |  |  |  |  | 0.198 |
| A levels/AS levels or equivalent | 1.36 | 1.25 | 1.47 | <0.001 |  |
| College or University degree | 1.3 | 1.24 | 1.36 | <0.001 |  |
| CSEs or equivalent | 1.33 | 1.15 | 1.53 | <0.001 |  |
| None of the above | 1.28 | 1.23 | 1.34 | <0.001 |  |
| NVQ or HND or HNC or equivalent | 1.24 | 1.14 | 1.35 | <0.001 |  |
| O levels/GCSEs or equivalent | 1.37 | 1.29 | 1.45 | <0.001 |  |
| Other professional qualifications eg: nursing, teaching | 1.2 | 1.09 | 1.32 | <0.001 |  |
| **Smoking status** |  |  |  |  | 0.001 |
| No | 1.34 | 1.31 | 1.37 | <0.001 |  |
| Yes | 1.17 | 1.09 | 1.26 | <0.001 |  |
| **Diabetes history** |  |  |  |  | <0.001 |
| No | 1.29 | 1.26 | 1.33 | <0.001 |  |
| Yes | 1.15 | 1.09 | 1.21 | <0.001 |  |
| **Hypertension history** |  |  |  |  | 0.348 |
| No | 1.3 | 1.24 | 1.37 | <0.001 |  |
| Yes | 1.27 | 1.23 | 1.3 | <0.001 |  |

**Supplementary Table 40** Subgroup analysis of TyG-WHtR index for CCVD incidence

| **Variable** | **Point Estimate** | **Lower** | **Upper** | **P value** | **P for interaction** |
| --- | --- | --- | --- | --- | --- |
| **Ethnicity** |  |  |  |  | 0.405 |
| Non-White | 1.47 | 1.28 | 1.69 | <0.001 |  |
| White | 1.57 | 1.5 | 1.63 | <0.001 |  |
| **Age** |  |  |  |  | 0.083 |
| <60 | 1.61 | 1.49 | 1.74 | <0.001 |  |
| ≥60 | 1.48 | 1.41 | 1.56 | <0.001 |  |
| **Alcohol use** |  |  |  |  | 0.012 |
| No | 1.34 | 1.18 | 1.51 | <0.001 |  |
| Yes | 1.58 | 1.52 | 1.65 | <0.001 |  |
| **Sex** |  |  |  |  | 0.343 |
| Female | 1.52 | 1.43 | 1.61 | <0.001 |  |
| Male | 1.45 | 1.36 | 1.54 | <0.001 |  |
| **Qualifications** |  |  |  |  | 0.214 |
| A levels/AS levels or equivalent | 1.6 | 1.39 | 1.84 | <0.001 |  |
| College or University degree | 1.53 | 1.41 | 1.66 | <0.001 |  |
| CSEs or equivalent | 1.5 | 1.18 | 1.9 | 0.001 |  |
| None of the above | 1.49 | 1.38 | 1.61 | <0.001 |  |
| NVQ or HND or HNC or equivalent | 1.33 | 1.15 | 1.54 | <0.001 |  |
| O levels/GCSEs or equivalent | 1.6 | 1.45 | 1.76 | <0.001 |  |
| Other professional qualifications eg: nursing, teaching | 1.29 | 1.1 | 1.52 | 0.002 |  |
| **Smoking status** |  |  |  |  | 0.003 |
| No | 1.59 | 1.52 | 1.66 | <0.001 |  |
| Yes | 1.3 | 1.14 | 1.47 | <0.001 |  |
| **Diabetes history** |  |  |  |  | <0.001 |
| No | 1.49 | 1.42 | 1.57 | <0.001 |  |
| Yes | 1.21 | 1.11 | 1.32 | <0.001 |  |
| **Hypertension history** |  |  |  |  | 0.39 |
| No | 1.51 | 1.38 | 1.64 | <0.001 |  |
| Yes | 1.44 | 1.37 | 1.51 | <0.001 |  |

**Supplementary Table 41** Subgroup analysis of TyG index for CCVD specific mortality

| **Variable** | **Point Estimate** | **Lower** | **Upper** | **P value** | **P for interaction** |
| --- | --- | --- | --- | --- | --- |
| **Ethnicity** |  |  |  |  | 0.097 |
| Non-White | 3.08 | 1.49 | 6.37 | 0.002 |  |
| White | 1.61 | 1.26 | 2.06 | <0.001 |  |
| **Age** |  |  |  |  | 0.449 |
| <60 | 1.95 | 1.16 | 3.27 | 0.012 |  |
| ≥60 | 1.55 | 1.18 | 2.04 | 0.002 |  |
| **Alcohol use** |  |  |  |  | 0.633 |
| No | 1.43 | 0.71 | 2.91 | 0.318 |  |
| Yes | 1.74 | 1.36 | 2.23 | <0.001 |  |
| **Sex** |  |  |  |  | 0.548 |
| Female | 1.66 | 1.08 | 2.54 | 0.02 |  |
| Male | 1.41 | 1.06 | 1.87 | 0.017 |  |
| **Qualifications** |  |  |  |  | 0.306 |
| A levels/AS levels or equivalent | 2.02 | 0.9 | 4.53 | 0.088 |  |
| College or University degree | 2.07 | 1.3 | 3.31 | 0.002 |  |
| CSEs or equivalent | 0.76 | 0.13 | 4.4 | 0.763 |  |
| None of the above | 1.27 | 0.84 | 1.92 | 0.251 |  |
| NVQ or HND or HNC or equivalent | 2.73 | 1.39 | 5.37 | 0.004 |  |
| O levels/GCSEs or equivalent | 1.21 | 0.69 | 2.15 | 0.507 |  |
| Other professional qualifications eg: nursing, teaching | 2.66 | 0.54 | 13.08 | 0.229 |  |
| **Smoking status** |  |  |  |  | 0.632 |
| No | 1.72 | 1.34 | 2.21 | <0.001 |  |
| Yes | 1.46 | 0.79 | 2.7 | 0.228 |  |
| **Diabetes history** |  |  |  |  | 0.939 |
| No | 1.41 | 1.05 | 1.89 | 0.024 |  |
| Yes | 1.44 | 0.95 | 2.17 | 0.085 |  |
| **Hypertension history** |  |  |  |  | 0.988 |
| No | 1.54 | 0.9 | 2.63 | 0.113 |  |
| Yes | 1.54 | 1.18 | 2.01 | 0.002 |  |

**Supplementary Table 42** Subgroup analysis of TyG-BMI index for CCVD-specific mortality

| **Variable** | **Point Estimate** | **Lower** | **Upper** | **P value** | **P for interaction** |
| --- | --- | --- | --- | --- | --- |
| **Ethnicity** |  |  |  |  | 0.181 |
| Non-White | 4.06 | 1.85 | 8.94 | <0.001 |  |
| White | 2.3 | 1.76 | 3.01 | <0.001 |  |
| **Age** |  |  |  |  | 0.494 |
| <60 | 2.95 | 1.69 | 5.16 | <0.001 |  |
| ≥60 | 2.35 | 1.74 | 3.18 | <0.001 |  |
| **Alcohol use** |  |  |  |  | 0.982 |
| No | 2.37 | 1.11 | 5.07 | 0.026 |  |
| Yes | 2.43 | 1.85 | 3.18 | <0.001 |  |
| **Sex** |  |  |  |  | 0.41 |
| Female | 2.16 | 1.35 | 3.45 | 0.001 |  |
| Male | 2.72 | 1.91 | 3.88 | <0.001 |  |
| **Qualifications** |  |  |  |  | 0.781 |
| A levels/AS levels or equivalent | 2.54 | 1.28 | 5.03 | 0.008 |  |
| College or University degree | 2.85 | 1.66 | 4.89 | <0.001 |  |
| CSEs or equivalent | 2.05 | 0.34 | 12.47 | 0.434 |  |
| None of the above | 2.21 | 1.44 | 3.39 | <0.001 |  |
| NVQ or HND or HNC or equivalent | 1.12 | 0.43 | 2.92 | 0.817 |  |
| O levels/GCSEs or equivalent | 2.15 | 1.1 | 4.22 | 0.026 |  |
| Other professional qualifications eg: nursing, teaching | 2.93 | 0.34 | 25.28 | 0.327 |  |
| **Smoking status** |  |  |  |  | 0.266 |
| No | 2.56 | 1.96 | 3.34 | <0.001 |  |
| Yes | 1.59 | 0.72 | 3.51 | 0.252 |  |
| **Diabetes history** |  |  |  |  | 0.463 |
| No | 2.2 | 1.56 | 3.1 | <0.001 |  |
| Yes | 1.77 | 1.08 | 2.9 | 0.024 |  |
| **Hypertension history** |  |  |  |  | 0.135 |
| No | 3.34 | 1.78 | 6.28 | <0.001 |  |
| Yes | 1.96 | 1.45 | 2.64 | <0.001 |  |

**Supplementary Table 43** Subgroup analysis of TyG-WC index for CCVD-specific mortality

| **Variable** | **Point Estimate** | **Lower** | **Upper** | **P value** | **P for interaction** |
| --- | --- | --- | --- | --- | --- |
| **Ethnicity** |  |  |  |  | 0.415 |
| Non-White | 1.66 | 1.27 | 2.17 | <0.001 |  |
| White | 1.49 | 1.36 | 1.62 | <0.001 |  |
| **Age** |  |  |  |  | 0.091 |
| <60 | 1.7 | 1.43 | 2.03 | <0.001 |  |
| ≥60 | 1.43 | 1.3 | 1.58 | <0.001 |  |
| **Alcohol use** |  |  |  |  | 0.885 |
| No | 1.47 | 1.15 | 1.87 | 0.002 |  |
| Yes | 1.5 | 1.38 | 1.64 | <0.001 |  |
| **Sex** |  |  |  |  | 0.758 |
| Female | 1.41 | 1.21 | 1.64 | <0.001 |  |
| Male | 1.36 | 1.21 | 1.53 | <0.001 |  |
| **Qualifications** |  |  |  |  | 0.926 |
| A levels/AS levels or equivalent | 1.53 | 1.15 | 2.02 | 0.003 |  |
| College or University degree | 1.57 | 1.33 | 1.85 | <0.001 |  |
| CSEs or equivalent | 1.54 | 0.8 | 2.96 | 0.199 |  |
| None of the above | 1.4 | 1.21 | 1.62 | <0.001 |  |
| NVQ or HND or HNC or equivalent | 1.58 | 1.22 | 2.04 | 0.001 |  |
| O levels/GCSEs or equivalent | 1.41 | 1.15 | 1.73 | 0.001 |  |
| Other professional qualifications eg: nursing, teaching | 1.21 | 0.63 | 2.32 | 0.571 |  |
| **Smoking status** |  |  |  |  | 0.25 |
| No | 1.53 | 1.4 | 1.67 | <0.001 |  |
| Yes | 1.32 | 1.04 | 1.67 | 0.023 |  |
| **Diabetes history** |  |  |  |  | 0.584 |
| No | 1.45 | 1.3 | 1.62 | <0.001 |  |
| Yes | 1.38 | 1.16 | 1.64 | <0.001 |  |
| **Hypertension history** |  |  |  |  | 0.268 |
| No | 1.58 | 1.31 | 1.92 | <0.001 |  |
| Yes | 1.4 | 1.27 | 1.55 | <0.001 |  |

**Supplementary Table 44** Subgroup analysis of TyG-WHtR index for CCVD-specific mortality

| **Variable** | **Point Estimate** | **Lower** | **Upper** | **P value** | **P for interaction** |
| --- | --- | --- | --- | --- | --- |
| **Ethnicity** |  |  |  |  | 0.36 |
| Non-White | 2.34 | 1.5 | 3.65 | <0.001 |  |
| White | 1.9 | 1.64 | 2.21 | <0.001 |  |
| **Age** |  |  |  |  | 0.064 |
| <60 | 2.45 | 1.81 | 3.3 | <0.001 |  |
| ≥60 | 1.77 | 1.49 | 2.1 | <0.001 |  |
| **Alcohol use** |  |  |  |  | 0.823 |
| No | 2 | 1.33 | 3.01 | 0.001 |  |
| Yes | 1.93 | 1.65 | 2.25 | <0.001 |  |
| **Sex** |  |  |  |  | 0.89 |
| Female | 1.83 | 1.44 | 2.33 | <0.001 |  |
| Male | 1.86 | 1.53 | 2.27 | <0.001 |  |
| **Qualifications** |  |  |  |  | 0.921 |
| A levels/AS levels or equivalent | 2.03 | 1.26 | 3.28 | 0.004 |  |
| College or University degree | 2.17 | 1.64 | 2.87 | <0.001 |  |
| CSEs or equivalent | 1.58 | 0.53 | 4.75 | 0.414 |  |
| None of the above | 1.69 | 1.31 | 2.18 | <0.001 |  |
| NVQ or HND or HNC or equivalent | 1.83 | 1.15 | 2.92 | 0.011 |  |
| O levels/GCSEs or equivalent | 1.78 | 1.25 | 2.53 | 0.001 |  |
| Other professional qualifications eg: nursing, teaching | 1.69 | 0.58 | 4.93 | 0.337 |  |
| **Smoking status** |  |  |  |  | 0.398 |
| No | 1.98 | 1.7 | 2.31 | <0.001 |  |
| Yes | 1.65 | 1.1 | 2.48 | 0.016 |  |
| **Diabetes history** |  |  |  |  | 0.738 |
| No | 1.81 | 1.5 | 2.18 | <0.001 |  |
| Yes | 1.71 | 1.28 | 2.3 | <0.001 |  |
| **Hypertension history** |  |  |  |  | 0.457 |
| No | 2.02 | 1.45 | 2.81 | <0.001 |  |
| Yes | 1.75 | 1.48 | 2.08 | <0.001 |  |

**Supplementary Table 45** Subgroup analysis of TyG index for CVD incidence

| **Variable** | **Point Estimate** | **Lower** | **Upper** | **P value** | **P for interaction** |
| --- | --- | --- | --- | --- | --- |
| **Ethnicity** |  |  |  |  | 0.475 |
| Non-White | 1.34 | 1.07 | 1.68 | 0.011 |  |
| White | 1.47 | 1.37 | 1.57 | <0.001 |  |
| **Age** |  |  |  |  | 0.01 |
| <60 | 1.6 | 1.41 | 1.81 | <0.001 |  |
| ≥60 | 1.32 | 1.22 | 1.42 | <0.001 |  |
| **Alcohol use** |  |  |  |  | <0.001 |
| No | 1.01 | 0.82 | 1.24 | 0.913 |  |
| Yes | 1.51 | 1.41 | 1.61 | <0.001 |  |
| **Sex** |  |  |  |  | 0.012 |
| Female | 1.47 | 1.33 | 1.63 | <0.001 |  |
| Male | 1.23 | 1.13 | 1.35 | <0.001 |  |
| **Qualifications** |  |  |  |  | 0.668 |
| A levels/AS levels or equivalent | 1.47 | 1.16 | 1.86 | 0.001 |  |
| College or University degree | 1.48 | 1.3 | 1.68 | <0.001 |  |
| CSEs or equivalent | 1.14 | 0.79 | 1.64 | 0.494 |  |
| None of the above | 1.38 | 1.22 | 1.56 | <0.001 |  |
| NVQ or HND or HNC or equivalent | 1.39 | 1.12 | 1.72 | 0.003 |  |
| O levels/GCSEs or equivalent | 1.4 | 1.2 | 1.63 | <0.001 |  |
| Other professional qualifications eg: nursing, teaching | 1.16 | 0.89 | 1.51 | 0.262 |  |
| **Smoking status** |  |  |  |  | 0.003 |
| No | 1.49 | 1.39 | 1.6 | <0.001 |  |
| Yes | 1.1 | 0.9 | 1.33 | 0.352 |  |
| **Diabetes history** |  |  |  |  | 0.028 |
| No | 1.31 | 1.21 | 1.42 | <0.001 |  |
| Yes | 1.11 | 0.98 | 1.26 | 0.096 |  |
| **Hypertension history** |  |  |  |  | 0.666 |
| No | 1.37 | 1.2 | 1.56 | <0.001 |  |
| Yes | 1.32 | 1.23 | 1.43 | <0.001 |  |

**Supplementary Table 46** Subgroup analysis of TyG-BMI index for CVD incidence

| **Variable** | **Point Estimate** | **Lower** | **Upper** | **P value** | **P for interaction** |
| --- | --- | --- | --- | --- | --- |
| **Ethnicity** |  |  |  |  | 0.097 |
| Non-White | 1.47 | 1.16 | 1.85 | 0.001 |  |
| White | 1.8 | 1.68 | 1.93 | <0.001 |  |
| **Age** |  |  |  |  | 0.368 |
| <60 | 1.85 | 1.64 | 2.09 | <0.001 |  |
| ≥60 | 1.73 | 1.59 | 1.87 | <0.001 |  |
| **Alcohol use** |  |  |  |  | 0.005 |
| No | 1.35 | 1.11 | 1.64 | 0.002 |  |
| Yes | 1.82 | 1.7 | 1.96 | <0.001 |  |
| **Sex** |  |  |  |  | 0.293 |
| Female | 1.8 | 1.65 | 1.98 | <0.001 |  |
| Male | 1.66 | 1.5 | 1.84 | <0.001 |  |
| **Qualifications** |  |  |  |  | 0.171 |
| A levels/AS levels or equivalent | 1.84 | 1.49 | 2.28 | <0.001 |  |
| College or University degree | 1.67 | 1.46 | 1.92 | <0.001 |  |
| CSEs or equivalent | 1.56 | 1.07 | 2.26 | 0.02 |  |
| None of the above | 1.75 | 1.55 | 1.98 | <0.001 |  |
| NVQ or HND or HNC or equivalent | 1.3 | 1.03 | 1.65 | 0.03 |  |
| O levels/GCSEs or equivalent | 1.83 | 1.57 | 2.14 | <0.001 |  |
| Other professional qualifications eg: nursing, teaching | 1.4 | 1.06 | 1.85 | 0.017 |  |
| **Smoking status** |  |  |  |  | 0.001 |
| No | 1.84 | 1.72 | 1.97 | <0.001 |  |
| Yes | 1.25 | 1.01 | 1.55 | 0.044 |  |
| **Diabetes history** |  |  |  |  | 0.004 |
| No | 1.61 | 1.48 | 1.75 | <0.001 |  |
| Yes | 1.27 | 1.12 | 1.45 | <0.001 |  |
| **Hypertension history** |  |  |  |  | 0.354 |
| No | 1.69 | 1.45 | 1.96 | <0.001 |  |
| Yes | 1.55 | 1.44 | 1.68 | <0.001 |  |

**Supplementary Table 47** Subgroup analysis of TyG-WC index for CVD incidence

| **Variable** | **Point Estimate** | **Lower** | **Upper** | **P value** | **P for interaction** |
| --- | --- | --- | --- | --- | --- |
| **Ethnicity** |  |  |  |  | 0.241 |
| Non-White | 1.27 | 1.17 | 1.38 | <0.001 |  |
| White | 1.33 | 1.3 | 1.37 | <0.001 |  |
| **Age** |  |  |  |  | 0.324 |
| <60 | 1.34 | 1.28 | 1.4 | <0.001 |  |
| ≥60 | 1.3 | 1.26 | 1.34 | <0.001 |  |
| **Alcohol use** |  |  |  |  | 0.004 |
| No | 1.2 | 1.11 | 1.29 | <0.001 |  |
| Yes | 1.34 | 1.31 | 1.38 | <0.001 |  |
| **Sex** |  |  |  |  | 0.011 |
| Female | 1.3 | 1.25 | 1.35 | <0.001 |  |
| Male | 1.21 | 1.17 | 1.26 | <0.001 |  |
| **Qualifications** |  |  |  |  | 0.228 |
| A levels/AS levels or equivalent | 1.34 | 1.23 | 1.46 | <0.001 |  |
| College or University degree | 1.3 | 1.24 | 1.37 | <0.001 |  |
| CSEs or equivalent | 1.32 | 1.14 | 1.52 | <0.001 |  |
| None of the above | 1.3 | 1.25 | 1.36 | <0.001 |  |
| NVQ or HND or HNC or equivalent | 1.24 | 1.14 | 1.35 | <0.001 |  |
| O levels/GCSEs or equivalent | 1.37 | 1.3 | 1.45 | <0.001 |  |
| Other professional qualifications eg: nursing, teaching | 1.2 | 1.09 | 1.32 | <0.001 |  |
| **Smoking status** |  |  |  |  | <0.001 |
| No | 1.35 | 1.31 | 1.38 | <0.001 |  |
| Yes | 1.16 | 1.08 | 1.25 | <0.001 |  |
| **Diabetes history** |  |  |  |  | <0.001 |
| No | 1.3 | 1.26 | 1.34 | <0.001 |  |
| Yes | 1.16 | 1.1 | 1.22 | <0.001 |  |
| **Hypertension history** |  |  |  |  | 0.273 |
| No | 1.31 | 1.25 | 1.38 | <0.001 |  |
| Yes | 1.27 | 1.23 | 1.31 | <0.001 |  |

**Supplementary Table 48** Subgroup analysis of TyG-WHtR index for CVD incidence

| **Variable** | **Point Estimate** | **Lower** | **Upper** | **P value** | **P for interaction** |
| --- | --- | --- | --- | --- | --- |
| **Ethnicity** |  |  |  |  | 0.226 |
| Non-White | 1.44 | 1.25 | 1.66 | <0.001 |  |
| White | 1.58 | 1.52 | 1.65 | <0.001 |  |
| **Age** |  |  |  |  | 0.209 |
| <60 | 1.6 | 1.48 | 1.73 | <0.001 |  |
| ≥60 | 1.51 | 1.43 | 1.58 | <0.001 |  |
| **Alcohol use** |  |  |  |  | 0.019 |
| No | 1.36 | 1.2 | 1.54 | <0.001 |  |
| Yes | 1.59 | 1.53 | 1.66 | <0.001 |  |
| **Sex** |  |  |  |  | 0.274 |
| Female | 1.54 | 1.45 | 1.63 | <0.001 |  |
| Male | 1.46 | 1.37 | 1.55 | <0.001 |  |
| **Qualifications** |  |  |  |  | 0.178 |
| A levels/AS levels or equivalent | 1.59 | 1.37 | 1.84 | <0.001 |  |
| College or University degree | 1.53 | 1.41 | 1.66 | <0.001 |  |
| CSEs or equivalent | 1.48 | 1.17 | 1.88 | 0.001 |  |
| None of the above | 1.54 | 1.43 | 1.67 | <0.001 |  |
| NVQ or HND or HNC or equivalent | 1.32 | 1.14 | 1.53 | <0.001 |  |
| O levels/GCSEs or equivalent | 1.6 | 1.45 | 1.76 | <0.001 |  |
| Other professional qualifications eg: nursing, teaching | 1.29 | 1.09 | 1.52 | 0.003 |  |
| **Smoking status** |  |  |  |  | 0.002 |
| No | 1.6 | 1.53 | 1.67 | <0.001 |  |
| Yes | 1.28 | 1.13 | 1.46 | <0.001 |  |
| **Diabetes history** |  |  |  |  | <0.001 |
| No | 1.5 | 1.43 | 1.58 | <0.001 |  |
| Yes | 1.23 | 1.12 | 1.34 | <0.001 |  |
| **Hypertension history** |  |  |  |  | 0.269 |
| No | 1.53 | 1.41 | 1.67 | <0.001 |  |
| Yes | 1.45 | 1.38 | 1.52 | <0.001 |  |

**Supplementary Table 49** Subgroup analysis of TyG index for CVD-specific mortality

| **Variable** | **Point Estimate** | **Lower** | **Upper** | **P value** | **P for interaction** |
| --- | --- | --- | --- | --- | --- |
| **Ethnicity** |  |  |  |  | 0.082 |
| Non-White | 4.28 | 1.73 | 10.57 | 0.002 |  |
| White | 1.86 | 1.4 | 2.47 | <0.001 |  |
| **Age** |  |  |  |  | 0.545 |
| <60 | 2.29 | 1.17 | 4.49 | 0.016 |  |
| ≥60 | 1.83 | 1.34 | 2.49 | <0.001 |  |
| **Alcohol use** |  |  |  |  | 0.903 |
| No | 1.87 | 0.77 | 4.54 | 0.163 |  |
| Yes | 2 | 1.5 | 2.66 | <0.001 |  |
| **Sex** |  |  |  |  | 0.721 |
| Female | 1.84 | 1.06 | 3.2 | 0.03 |  |
| Male | 1.63 | 1.18 | 2.23 | 0.003 |  |
| **Qualifications** |  |  |  |  | 0.633 |
| A levels/AS levels or equivalent | 2.43 | 0.9 | 6.57 | 0.08 |  |
| College or University degree | 2.56 | 1.42 | 4.59 | 0.002 |  |
| CSEs or equivalent | 1.73 | 0.26 | 11.75 | 0.574 |  |
| None of the above | 1.42 | 0.91 | 2.22 | 0.127 |  |
| NVQ or HND or HNC or equivalent | 2.52 | 1.17 | 5.44 | 0.018 |  |
| O levels/GCSEs or equivalent | 1.47 | 0.73 | 2.94 | 0.278 |  |
| Other professional qualifications eg: nursing, teaching | 3.93 | 0.47 | 32.87 | 0.207 |  |
| **Smoking status** |  |  |  |  | 0.714 |
| No | 1.99 | 1.49 | 2.68 | <0.001 |  |
| Yes | 1.72 | 0.84 | 3.53 | 0.139 |  |
| **Diabetes history** |  |  |  |  | 0.374 |
| No | 1.5 | 1.05 | 2.13 | 0.024 |  |
| Yes | 1.96 | 1.22 | 3.13 | 0.005 |  |
| **Hypertension history** |  |  |  |  | 0.95 |
| No | 1.77 | 0.95 | 3.31 | 0.072 |  |
| Yes | 1.81 | 1.33 | 2.48 | <0.001 |  |

**Supplementary Table 50** Subgroup analysis of TyG-BMI index for CVD- specific mortality

| **Variable** | **Point Estimate** | **Lower** | **Upper** | **P value** | **P for interaction** |
| --- | --- | --- | --- | --- | --- |
| **Ethnicity** |  |  |  |  | 0.181 |
| Non-White | 4.06 | 1.85 | 8.94 | <0.001 |  |
| White | 2.3 | 1.76 | 3.01 | <0.001 |  |
| **Age** |  |  |  |  | 0.494 |
| <60 | 2.95 | 1.69 | 5.16 | <0.001 |  |
| ≥60 | 2.35 | 1.74 | 3.18 | <0.001 |  |
| **Alcohol use** |  |  |  |  | 0.982 |
| No | 2.37 | 1.11 | 5.07 | 0.026 |  |
| Yes | 2.43 | 1.85 | 3.18 | <0.001 |  |
| **Sex** |  |  |  |  | 0.41 |
| Female | 2.16 | 1.35 | 3.45 | 0.001 |  |
| Male | 2.72 | 1.91 | 3.88 | <0.001 |  |
| **Qualifications** |  |  |  |  | 0.781 |
| A levels/AS levels or equivalent | 2.54 | 1.28 | 5.03 | 0.008 |  |
| College or University degree | 2.85 | 1.66 | 4.89 | <0.001 |  |
| CSEs or equivalent | 2.05 | 0.34 | 12.47 | 0.434 |  |
| None of the above | 2.21 | 1.44 | 3.39 | <0.001 |  |
| NVQ or HND or HNC or equivalent | 1.12 | 0.43 | 2.92 | 0.817 |  |
| O levels/GCSEs or equivalent | 2.15 | 1.1 | 4.22 | 0.026 |  |
| Other professional qualifications eg: nursing, teaching | 2.93 | 0.34 | 25.28 | 0.327 |  |
| **Smoking status** |  |  |  |  | 0.266 |
| No | 2.56 | 1.96 | 3.34 | <0.001 |  |
| Yes | 1.59 | 0.72 | 3.51 | 0.252 |  |
| **Diabetes history** |  |  |  |  | 0.463 |
| No | 2.2 | 1.56 | 3.1 | <0.001 |  |
| Yes | 1.77 | 1.08 | 2.9 | 0.024 |  |
| **Hypertension history** |  |  |  |  | 0.135 |
| No | 3.34 | 1.78 | 6.28 | <0.001 |  |
| Yes | 1.96 | 1.45 | 2.64 | <0.001 |  |

**Supplementary Table 51** Subgroup analysis of TyG-WC index for CVD-specific mortality

| **Variable** | **Point Estimate** | **Lower** | **Upper** | **P value** | **P for interaction** |
| --- | --- | --- | --- | --- | --- |
| **Ethnicity** |  |  |  |  | 0.098 |
| Non-White | 2.08 | 1.5 | 2.9 | <0.001 |  |
| White | 1.57 | 1.42 | 1.74 | <0.001 |  |
| **Age** |  |  |  |  | 0.27 |
| <60 | 1.8 | 1.42 | 2.27 | <0.001 |  |
| ≥60 | 1.55 | 1.39 | 1.74 | <0.001 |  |
| **Alcohol use** |  |  |  |  | 0.704 |
| No | 1.51 | 1.1 | 2.07 | 0.011 |  |
| Yes | 1.62 | 1.46 | 1.79 | <0.001 |  |
| **Sex** |  |  |  |  | 0.926 |
| Female | 1.47 | 1.21 | 1.79 | <0.001 |  |
| Male | 1.45 | 1.27 | 1.65 | <0.001 |  |
| **Qualifications** |  |  |  |  | 0.953 |
| A levels/AS levels or equivalent | 1.64 | 1.17 | 2.3 | 0.004 |  |
| College or University degree | 1.7 | 1.38 | 2.08 | <0.001 |  |
| CSEs or equivalent | 1.63 | 0.78 | 3.42 | 0.197 |  |
| None of the above | 1.53 | 1.3 | 1.79 | <0.001 |  |
| NVQ or HND or HNC or equivalent | 1.35 | 0.97 | 1.87 | 0.072 |  |
| O levels/GCSEs or equivalent | 1.56 | 1.22 | 2 | <0.001 |  |
| Other professional qualifications eg: nursing, teaching | 1.62 | 0.68 | 3.86 | 0.275 |  |
| **Smoking status** |  |  |  |  | 0.109 |
| No | 1.65 | 1.49 | 1.84 | <0.001 |  |
| Yes | 1.3 | 0.98 | 1.72 | 0.072 |  |
| **Diabetes history** |  |  |  |  | 0.739 |
| No | 1.56 | 1.38 | 1.77 | <0.001 |  |
| Yes | 1.5 | 1.23 | 1.84 | <0.001 |  |
| **Hypertension history** |  |  |  |  | 0.078 |
| No | 1.88 | 1.52 | 2.32 | <0.001 |  |
| Yes | 1.47 | 1.31 | 1.65 | <0.001 |  |

**Supplementary Table 52** Subgroup analysis of TyG-WHtR index for CVD-specific mortality

| **Variable** | **Point Estimate** | **Lower** | **Upper** | **P value** | **P for interaction** |
| --- | --- | --- | --- | --- | --- |
| **Ethnicity** |  |  |  |  | 0.072 |
| Non-White | 3.38 | 1.98 | 5.77 | <0.001 |  |
| White | 2.05 | 1.72 | 2.44 | <0.001 |  |
| **Age** |  |  |  |  | 0.338 |
| <60 | 2.51 | 1.68 | 3.76 | <0.001 |  |
| ≥60 | 2.02 | 1.67 | 2.45 | <0.001 |  |
| **Alcohol use** |  |  |  |  | 0.902 |
| No | 2.05 | 1.21 | 3.48 | 0.007 |  |
| Yes | 2.15 | 1.81 | 2.57 | <0.001 |  |
| **Sex** |  |  |  |  | 0.833 |
| Female | 2 | 1.48 | 2.72 | <0.001 |  |
| Male | 2.07 | 1.65 | 2.58 | <0.001 |  |
| **Qualifications** |  |  |  |  | 0.793 |
| A levels/AS levels or equivalent | 2.26 | 1.28 | 4.02 | 0.005 |  |
| College or University degree | 2.37 | 1.67 | 3.37 | <0.001 |  |
| CSEs or equivalent | 1.72 | 0.5 | 5.98 | 0.39 |  |
| None of the above | 1.97 | 1.49 | 2.59 | <0.001 |  |
| NVQ or HND or HNC or equivalent | 1.36 | 0.76 | 2.43 | 0.295 |  |
| O levels/GCSEs or equivalent | 2.01 | 1.31 | 3.08 | 0.001 |  |
| Other professional qualifications eg: nursing, teaching | 2.68 | 0.72 | 9.95 | 0.142 |  |
| **Smoking status** |  |  |  |  | 0.182 |
| No | 2.23 | 1.86 | 2.66 | <0.001 |  |
| Yes | 1.57 | 0.97 | 2.55 | 0.067 |  |
| **Diabetes history** |  |  |  |  | 0.947 |
| No | 1.98 | 1.59 | 2.47 | <0.001 |  |
| Yes | 1.96 | 1.39 | 2.76 | <0.001 |  |
| **Hypertension history** |  |  |  |  | 0.111 |
| No | 2.62 | 1.82 | 3.77 | <0.001 |  |
| Yes | 1.87 | 1.53 | 2.28 | <0.001 |  |

**Supplementary Table 53** Subgroup analysis of TyG index for heart failure incidence

| **Variable** | **Point Estimate** | **Lower** | **Upper** | **P value** | **P for interaction** |
| --- | --- | --- | --- | --- | --- |
| **Ethnicity** |  |  |  |  | 0.345 |
| Non-White | 1.14 | 0.76 | 1.71 | 0.525 |  |
| White | 1.4 | 1.24 | 1.57 | <0.001 |  |
| **Age** |  |  |  |  | 0.008 |
| <60 | 1.7 | 1.35 | 2.13 | <0.001 |  |
| ≥60 | 1.19 | 1.04 | 1.36 | 0.011 |  |
| **Alcohol use** |  |  |  |  | 0.483 |
| No | 1.23 | 0.9 | 1.68 | 0.201 |  |
| Yes | 1.38 | 1.22 | 1.55 | <0.001 |  |
| **Sex** |  |  |  |  | 0.021 |
| Female | 1.48 | 1.25 | 1.75 | <0.001 |  |
| Male | 1.13 | 0.97 | 1.31 | 0.119 |  |
| **Qualifications** |  |  |  |  | 0.276 |
| A levels/AS levels or equivalent | 1.54 | 1.04 | 2.27 | 0.029 |  |
| College or University degree | 1.37 | 1.08 | 1.73 | 0.009 |  |
| CSEs or equivalent | 0.56 | 0.27 | 1.15 | 0.113 |  |
| None of the above | 1.33 | 1.09 | 1.63 | 0.005 |  |
| NVQ or HND or HNC or equivalent | 1.32 | 0.9 | 1.92 | 0.157 |  |
| O levels/GCSEs or equivalent | 1.32 | 1.02 | 1.72 | 0.038 |  |
| Other professional qualifications eg: nursing, teaching | 1.02 | 0.64 | 1.63 | 0.937 |  |
| **Smoking status** |  |  |  |  | 0.014 |
| No | 1.43 | 1.27 | 1.61 | <0.001 |  |
| Yes | 0.92 | 0.66 | 1.28 | 0.607 |  |
| **Diabetes history** |  |  |  |  | 0.806 |
| No | 1.11 | 0.96 | 1.28 | 0.153 |  |
| Yes | 1.08 | 0.89 | 1.31 | 0.437 |  |
| **Hypertension history** |  |  |  |  | 0.347 |
| No | 1.15 | 0.91 | 1.44 | 0.235 |  |
| Yes | 1.31 | 1.14 | 1.49 | <0.001 |  |

**Supplementary Table 54** Subgroup analysis of TyG-BMI index for heart failure incidence

| **Variable** | **Point Estimate** | **Lower** | **Upper** | **P value** | **P for interaction** |
| --- | --- | --- | --- | --- | --- |
| **Ethnicity** |  |  |  |  | 0.016 |
| Non-White | 1.24 | 0.81 | 1.88 | 0.319 |  |
| White | 2.1 | 1.88 | 2.35 | <0.001 |  |
| **Age** |  |  |  |  | 0.101 |
| <60 | 2.34 | 1.91 | 2.86 | <0.001 |  |
| ≥60 | 1.91 | 1.67 | 2.18 | <0.001 |  |
| **Alcohol use** |  |  |  |  | 0.211 |
| No | 1.68 | 1.27 | 2.23 | <0.001 |  |
| Yes | 2.04 | 1.82 | 2.3 | <0.001 |  |
| **Sex** |  |  |  |  | 0.204 |
| Female | 2.14 | 1.85 | 2.47 | <0.001 |  |
| Male | 1.84 | 1.54 | 2.19 | <0.001 |  |
| **Qualifications** |  |  |  |  | 0.521 |
| A levels/AS levels or equivalent | 2.24 | 1.64 | 3.06 | <0.001 |  |
| College or University degree | 1.92 | 1.51 | 2.43 | <0.001 |  |
| CSEs or equivalent | 1.13 | 0.53 | 2.43 | 0.752 |  |
| None of the above | 2.01 | 1.66 | 2.44 | <0.001 |  |
| NVQ or HND or HNC or equivalent | 1.69 | 1.15 | 2.47 | 0.007 |  |
| O levels/GCSEs or equivalent | 1.95 | 1.51 | 2.53 | <0.001 |  |
| Other professional qualifications eg: nursing, teaching | 1.41 | 0.86 | 2.3 | 0.169 |  |
| **Smoking status** |  |  |  |  | 0.033 |
| No | 2.1 | 1.88 | 2.35 | <0.001 |  |
| Yes | 1.39 | 0.97 | 2 | 0.074 |  |
| **Diabetes history** |  |  |  |  | 0.402 |
| No | 1.66 | 1.43 | 1.93 | <0.001 |  |
| Yes | 1.5 | 1.23 | 1.83 | <0.001 |  |
| **Hypertension history** |  |  |  |  | 0.025 |
| No | 1.39 | 1.06 | 1.83 | 0.016 |  |
| Yes | 1.96 | 1.73 | 2.22 | <0.001 |  |

**Supplementary Table 55**  Subgroup analysis of TyG-WC index for heart failure incidence

| **Variable** | **Point Estimate** | **Lower** | **Upper** | **P value** | **P for interaction** |
| --- | --- | --- | --- | --- | --- |
| **Ethnicity** |  |  |  |  | 0.203 |
| Non-White | 1.26 | 1.09 | 1.45 | 0.002 |  |
| White | 1.39 | 1.33 | 1.45 | <0.001 |  |
| **Age** |  |  |  |  | 0.27 |
| <60 | 1.41 | 1.3 | 1.53 | <0.001 |  |
| ≥60 | 1.34 | 1.28 | 1.41 | <0.001 |  |
| **Alcohol use** |  |  |  |  | 0.407 |
| No | 1.31 | 1.17 | 1.46 | <0.001 |  |
| Yes | 1.38 | 1.32 | 1.44 | <0.001 |  |
| **Sex** |  |  |  |  | 0.025 |
| Female | 1.39 | 1.31 | 1.48 | <0.001 |  |
| Male | 1.26 | 1.18 | 1.34 | <0.001 |  |
| **Qualifications** |  |  |  |  | 0.516 |
| A levels/AS levels or equivalent | 1.43 | 1.25 | 1.64 | <0.001 |  |
| College or University degree | 1.35 | 1.24 | 1.46 | <0.001 |  |
| CSEs or equivalent | 1.08 | 0.82 | 1.43 | 0.569 |  |
| None of the above | 1.35 | 1.25 | 1.45 | <0.001 |  |
| NVQ or HND or HNC or equivalent | 1.36 | 1.18 | 1.56 | <0.001 |  |
| O levels/GCSEs or equivalent | 1.39 | 1.27 | 1.53 | <0.001 |  |
| Other professional qualifications eg: nursing, teaching | 1.21 | 1.02 | 1.43 | 0.031 |  |
| **Smoking status** |  |  |  |  | 0.08 |
| No | 1.39 | 1.33 | 1.45 | <0.001 |  |
| Yes | 1.23 | 1.09 | 1.4 | 0.001 |  |
| **Diabetes history** |  |  |  |  | 0.46 |
| No | 1.28 | 1.22 | 1.35 | <0.001 |  |
| Yes | 1.24 | 1.14 | 1.34 | <0.001 |  |
| **Hypertension history** |  |  |  |  | 0.079 |
| No | 1.24 | 1.14 | 1.36 | <0.001 |  |
| Yes | 1.36 | 1.3 | 1.43 | <0.001 |  |

**Supplementary Table 56** Subgroup analysis of TyG-WHtR index for heart failure incidence

| **Variable** | **Point Estimate** | **Lower** | **Upper** | **P value** | **P for interaction** |
| --- | --- | --- | --- | --- | --- |
| **Ethnicity** |  |  |  |  | 0.098 |
| Non-White | 1.37 | 1.07 | 1.77 | 0.013 |  |
| White | 1.71 | 1.59 | 1.84 | <0.001 |  |
| **Age** |  |  |  |  | 0.127 |
| <60 | 1.81 | 1.57 | 2.08 | <0.001 |  |
| ≥60 | 1.59 | 1.46 | 1.73 | <0.001 |  |
| **Alcohol use** |  |  |  |  | 0.577 |
| No | 1.59 | 1.32 | 1.91 | <0.001 |  |
| Yes | 1.68 | 1.56 | 1.81 | <0.001 |  |
| **Sex** |  |  |  |  | 0.258 |
| Female | 1.69 | 1.54 | 1.87 | <0.001 |  |
| Male | 1.55 | 1.39 | 1.73 | <0.001 |  |
| **Qualifications** |  |  |  |  | 0.383 |
| A levels/AS levels or equivalent | 1.79 | 1.41 | 2.27 | <0.001 |  |
| College or University degree | 1.67 | 1.44 | 1.93 | <0.001 |  |
| CSEs or equivalent | 1.09 | 0.68 | 1.76 | 0.717 |  |
| None of the above | 1.64 | 1.45 | 1.86 | <0.001 |  |
| NVQ or HND or HNC or equivalent | 1.58 | 1.23 | 2.02 | <0.001 |  |
| O levels/GCSEs or equivalent | 1.64 | 1.39 | 1.93 | <0.001 |  |
| Other professional qualifications eg: nursing, teaching | 1.27 | 0.94 | 1.71 | 0.122 |  |
| **Smoking status** |  |  |  |  | 0.105 |
| No | 1.71 | 1.59 | 1.84 | <0.001 |  |
| Yes | 1.42 | 1.14 | 1.76 | 0.002 |  |
| **Diabetes history** |  |  |  |  | 0.604 |
| No | 1.48 | 1.35 | 1.62 | <0.001 |  |
| Yes | 1.42 | 1.24 | 1.62 | <0.001 |  |
| **Hypertension history** |  |  |  |  | 0.041 |
| No | 1.39 | 1.19 | 1.62 | <0.001 |  |
| Yes | 1.67 | 1.53 | 1.81 | <0.001 |  |

**Supplementary Table 57** Subgroup analysis of TyG index for stroke incidence

| **Variable** | **Point Estimate** | **Lower** | **Upper** | **P value** | **P for interaction** |
| --- | --- | --- | --- | --- | --- |
| **Ethnicity** |  |  |  |  | 0.733 |
| Non-White | 1.22 | 0.76 | 1.96 | 0.419 |  |
| White | 1.33 | 1.16 | 1.53 | <0.001 |  |
| **Age** |  |  |  |  | 0.009 |
| <60 | 1.7 | 1.31 | 2.22 | <0.001 |  |
| ≥60 | 1.12 | 0.96 | 1.32 | 0.156 |  |
| **Alcohol use** |  |  |  |  | 0.684 |
| No | 1.21 | 0.82 | 1.8 | 0.338 |  |
| Yes | 1.32 | 1.15 | 1.53 | <0.001 |  |
| **Sex** |  |  |  |  | 0.161 |
| Female | 1.38 | 1.13 | 1.68 | 0.002 |  |
| Male | 1.13 | 0.94 | 1.36 | 0.193 |  |
| **Qualifications** |  |  |  |  | 0.689 |
| A levels/AS levels or equivalent | 1.68 | 1.05 | 2.68 | 0.03 |  |
| College or University degree | 1.25 | 0.97 | 1.61 | 0.089 |  |
| CSEs or equivalent | 1.86 | 0.75 | 4.61 | 0.178 |  |
| None of the above | 1.37 | 1.06 | 1.78 | 0.017 |  |
| NVQ or HND or HNC or equivalent | 1.24 | 0.78 | 2 | 0.364 |  |
| O levels/GCSEs or equivalent | 1.05 | 0.78 | 1.42 | 0.747 |  |
| Other professional qualifications eg: nursing, teaching | 1.41 | 0.8 | 2.51 | 0.238 |  |
| **Smoking status** |  |  |  |  | 0.318 |
| No | 1.28 | 1.11 | 1.47 | 0.001 |  |
| Yes | 1.57 | 1.07 | 2.31 | 0.021 |  |
| **Diabetes history** |  |  |  |  | 0.409 |
| No | 1.1 | 0.93 | 1.3 | 0.255 |  |
| Yes | 1.25 | 0.97 | 1.61 | 0.081 |  |
| **Hypertension history** |  |  |  |  | 0.693 |
| No | 1.28 | 0.98 | 1.67 | 0.072 |  |
| Yes | 1.2 | 1.02 | 1.41 | 0.026 |  |

**Supplementary Table 58** Subgroup analysis of TyG-BMI index for stroke incidence

| **Variable** | **Point Estimate** | **Lower** | **Upper** | **P value** | **P for interaction** |
| --- | --- | --- | --- | --- | --- |
| **Ethnicity** |  |  |  |  | 0.469 |
| Non-White | 1.04 | 0.61 | 1.75 | 0.894 |  |
| White | 1.27 | 1.09 | 1.48 | 0.002 |  |
| **Age** |  |  |  |  | 0.725 |
| <60 | 1.27 | 0.94 | 1.7 | 0.115 |  |
| ≥60 | 1.19 | 1 | 1.42 | 0.051 |  |
| **Alcohol use** |  |  |  |  | 0.808 |
| No | 1.18 | 0.8 | 1.74 | 0.408 |  |
| Yes | 1.24 | 1.06 | 1.46 | 0.007 |  |
| **Sex** |  |  |  |  | 0.298 |
| Female | 1.29 | 1.06 | 1.57 | 0.01 |  |
| Male | 1.09 | 0.86 | 1.39 | 0.456 |  |
| **Qualifications** |  |  |  |  | 0.757 |
| A levels/AS levels or equivalent | 1.19 | 0.7 | 2.02 | 0.526 |  |
| College or University degree | 1.22 | 0.92 | 1.62 | 0.164 |  |
| CSEs or equivalent | 1.75 | 0.7 | 4.4 | 0.232 |  |
| None of the above | 1.38 | 1.05 | 1.82 | 0.021 |  |
| NVQ or HND or HNC or equivalent | 0.89 | 0.51 | 1.57 | 0.696 |  |
| O levels/GCSEs or equivalent | 1.1 | 0.78 | 1.53 | 0.595 |  |
| Other professional qualifications eg: nursing, teaching | 0.95 | 0.48 | 1.86 | 0.872 |  |
| **Smoking status** |  |  |  |  | 0.932 |
| No | 1.25 | 1.07 | 1.46 | 0.004 |  |
| Yes | 1.23 | 0.79 | 1.91 | 0.357 |  |
| **Diabetes history** |  |  |  |  | 0.882 |
| No | 1.01 | 0.84 | 1.22 | 0.919 |  |
| Yes | 1.04 | 0.78 | 1.38 | 0.791 |  |
| **Hypertension history** |  |  |  |  | 0.87 |
| No | 1.07 | 0.76 | 1.49 | 0.709 |  |
| Yes | 1.1 | 0.93 | 1.31 | 0.279 |  |

**Supplementary Table 59** Subgroup analysis of TyG-WC index for stroke incidence

| **Variable** | **Point Estimate** | **Lower** | **Upper** | **P value** | **P for interaction** |
| --- | --- | --- | --- | --- | --- |
| **Ethnicity** |  |  |  |  | 0.572 |
| Non-White | 1.13 | 0.95 | 1.35 | 0.178 |  |
| White | 1.2 | 1.14 | 1.26 | <0.001 |  |
| **Age** |  |  |  |  | 0.364 |
| <60 | 1.22 | 1.1 | 1.35 | <0.001 |  |
| ≥60 | 1.15 | 1.08 | 1.22 | <0.001 |  |
| **Alcohol use** |  |  |  |  | 0.766 |
| No | 1.21 | 1.05 | 1.4 | 0.007 |  |
| Yes | 1.19 | 1.12 | 1.25 | <0.001 |  |
| **Sex** |  |  |  |  | 0.118 |
| Female | 1.18 | 1.1 | 1.28 | <0.001 |  |
| Male | 1.08 | 1 | 1.17 | 0.057 |  |
| **Qualifications** |  |  |  |  | 0.692 |
| A levels/AS levels or equivalent | 1.24 | 1.05 | 1.48 | 0.013 |  |
| College or University degree | 1.14 | 1.04 | 1.25 | 0.007 |  |
| CSEs or equivalent | 1.46 | 1.02 | 2.09 | 0.041 |  |
| None of the above | 1.22 | 1.11 | 1.34 | <0.001 |  |
| NVQ or HND or HNC or equivalent | 1.15 | 0.96 | 1.39 | 0.134 |  |
| O levels/GCSEs or equivalent | 1.18 | 1.05 | 1.32 | 0.004 |  |
| Other professional qualifications eg: nursing, teaching | 1.04 | 0.83 | 1.3 | 0.728 |  |
| **Smoking status** |  |  |  |  | 0.992 |
| No | 1.19 | 1.13 | 1.25 | <0.001 |  |
| Yes | 1.19 | 1.02 | 1.39 | 0.024 |  |
| **Diabetes history** |  |  |  |  | 0.675 |
| No | 1.13 | 1.06 | 1.2 | <0.001 |  |
| Yes | 1.1 | 0.99 | 1.23 | 0.075 |  |
| **Hypertension history** |  |  |  |  | 0.438 |
| No | 1.19 | 1.07 | 1.32 | 0.001 |  |
| Yes | 1.13 | 1.06 | 1.2 | <0.001 |  |

**Supplementary Table 60** Subgroup analysis of TyG-WHtR index for stroke incidence

| **Variable** | **Point Estimate** | **Lower** | **Upper** | **P value** | **P for interaction** |
| --- | --- | --- | --- | --- | --- |
| **Ethnicity** |  |  |  |  | 0.597 |
| Non-White | 1.22 | 0.9 | 1.66 | 0.204 |  |
| White | 1.34 | 1.22 | 1.46 | <0.001 |  |
| **Age** |  |  |  |  | 0.523 |
| <60 | 1.34 | 1.12 | 1.6 | 0.001 |  |
| ≥60 | 1.25 | 1.13 | 1.39 | <0.001 |  |
| **Alcohol use** |  |  |  |  | 0.889 |
| No | 1.34 | 1.05 | 1.7 | 0.018 |  |
| Yes | 1.32 | 1.2 | 1.44 | <0.001 |  |
| **Sex** |  |  |  |  | 0.253 |
| Female | 1.33 | 1.18 | 1.5 | <0.001 |  |
| Male | 1.19 | 1.04 | 1.37 | 0.013 |  |
| **Qualifications** |  |  |  |  | 0.783 |
| A levels/AS levels or equivalent | 1.36 | 1 | 1.84 | 0.051 |  |
| College or University degree | 1.27 | 1.07 | 1.5 | 0.005 |  |
| CSEs or equivalent | 1.71 | 0.94 | 3.11 | 0.079 |  |
| None of the above | 1.42 | 1.2 | 1.68 | <0.001 |  |
| NVQ or HND or HNC or equivalent | 1.18 | 0.85 | 1.64 | 0.314 |  |
| O levels/GCSEs or equivalent | 1.21 | 0.99 | 1.48 | 0.058 |  |
| Other professional qualifications eg: nursing, teaching | 1.12 | 0.76 | 1.65 | 0.566 |  |
| **Smoking status** |  |  |  |  | 0.823 |
| No | 1.32 | 1.2 | 1.45 | <0.001 |  |
| Yes | 1.36 | 1.05 | 1.77 | 0.021 |  |
| **Diabetes history** |  |  |  |  | 0.848 |
| No | 1.2 | 1.07 | 1.33 | 0.001 |  |
| Yes | 1.17 | 0.98 | 1.41 | 0.088 |  |
| **Hypertension history** |  |  |  |  | 0.618 |
| No | 1.29 | 1.07 | 1.54 | 0.007 |  |
| Yes | 1.22 | 1.1 | 1.35 | <0.001 |  |

**Supplementary Table 6**1 **Association between IR indices and CCVD incidence after excluding any events occurring within one years from the baseline.**

| Type | Cases/total sample size | Model 1 | | | Model 2 | | |
| --- | --- | --- | --- | --- | --- | --- | --- |
| HR1 (95% CI1) | P-value | P for trend | HR1 (95% CI1) | P-value | P for trend |
| TyG Index | |  |  |  |  |  |  |
| Q1 (0-25%) | 554/4561 | Reference |  | 2.93 (2.41, 3.56)  < 0.001 | Reference |  | 1.19 (0.97, 1.96)  p = 0.103 |
| Q2 (25-50%) | 632/4530 | 1.17 (1.05, 1.31) | 0.006 | 1.01 (0.90, 1.13) | 0.899 |
| Q3 (50-75%) | 764/4526 | 1.44 (1.29, 1.60) | < 0.001 | 1.10 (0.98, 1.23) | 0.096 |
| Q4 (75-100%) | 843/4495 | 1.65 (1.48, 1.83) | < 0.001 | 1.10 (0.98, 1.23) | 0.097 |
| TyG-BMI Index | |  |  |  |  |  |  |
| Q1 (0-25%) | 504/4550 | Reference |  | 1.74 (1.63, 1.86)  < 0.001 | Reference |  | 1.35 (1.24, 1.46)  < 0.001 |
| Q2 (25-50%) | 630/4535 | 1.28 (1.13, 1.43) | < 0.001 | 1.00 (0.89, 1.13) | 0.962 |
| Q3 (50-75%) | 705/4525 | 1.45 (1.30, 1.63) | < 0.001 | 1.01 (0.90, 1.14) | 0.815 |
| Q4 (75-100%) | 954/4502 | 2.06 (1.85, 2.29) | < 0.001 | 1.33 (1.18, 1.49) | < 0.001 |
| TyG-WC Index | |  |  |  |  |  |  |
| Q1 (0-25%) | 424/4580 | Reference |  | 1.32 (1.29, 1.35)  < 0.001 | Reference |  | 1.13 (1.10, 1.17)  < 0.001 |
| Q2 (25-50%) | 587/4546 | 1.45 (1.28, 1.65) | < 0.001 | 1.08 (0.95, 1.23) | 0.230 |
| Q3 (50-75%) | 734/4510 | 1.88 (1.67, 2.12) | < 0.001 | 1.14 (1.01, 1.30) | 0.041 |
| Q4 (75-100%) | 1048/4576 | 2.88 (2.58, 3.23) | < 0.001 | 1.49 (1.31, 1.69) | < 0.001 |
| TyG-WHtR Index | |  |  |  |  |  |  |
| Q1 (0-25%) | 455/4570 | Reference |  | 3.71 (3.28, 4.21)  < 0.001 | Reference |  | 1.92 (1.66, 2.23)  < 0.001 |
| Q2 (25-50%) | 611/4548 | 1.39 (1.23, 1.57) | < 0.001 | 1.06 (0.93, 1.19) | 0.388 |
| Q3 (50-75%) | 712/4501 | 1.69 (1.50, 1.90) | < 0.001 | 1.07 (0.94, 1.21) | 0.304 |
| Q4 (75-100%) | 1015/4493 | 2.54 (2.28, 2.84) | < 0.001 | 1.42 (1.26, 1.61) | < 0.001 |

1HR = Hazard Ratio, CI = Confidence Interval

Model 1: Unadjusted model.

Model 2: Adjusted for Age, Sex, Ethnicity, Education level, Townsend deprivation index, Alcohol consumption, Smoking status, diabetes history, and hypertension history.

**Supplementary Table 62** **Association between IR indices and CCVD related mortality after excluding any events occurring within two years from the baseline.**

| Type | Cases/total sample size | Model 1 | | | Model 2 | | |
| --- | --- | --- | --- | --- | --- | --- | --- |
| HR1 (95% CI1) | P-value | P for trend | HR1 (95% CI1) | P-value | P for trend |
| TyG Index | |  |  |  |  |  |  |
| Q1 (0-25%) | 30/4561 | Reference |  | 2.93 (2.41, 3.56)  < 0.001 | Reference |  | 1.69 (0.79, 3.61)  0.173 |
| Q2 (25-50%) | 46/4530 | 1.57 (0.99, 2.49) | 0.055 | 1.29 90.81, 2.05) | 0.276 |
| Q3 (50-75%) | 64/4526 | 2.19 (1.42, 3.37) | < 0.001 | 1.52 (0.98, 2.35) | 0.063 |
| Q4 (75-100%) | 59/4495 | 2.07 (1.34, 3.22) | 0.001 | 1.24 (0.79, 1.94) | 0.357 |
| TyG-BMI Index | |  |  |  |  |  |  |
| Q1 (0-25%) | 18/4550 | Reference |  | 2.24 (1.79, 2.81)  < 0.001 | Reference |  | 1.80 (1.36, 2.38)  < 0.001 |
| Q2 (25-50%) | 55/4535 | 3.06 (1.80, 5.22) | < 0.001 | 2.19 (1.28, 3.75) | 0.004 |
| Q3 (50-75%) | 51/4525 | 2.88 (1.68, 4.92) | < 0.001 | 1.77 (1.02, 3.05) | 0.041 |
| Q4 (75-100%) | 75/4502 | 4.32 (2.58, 7.23) | < 0.001 | 2.48 (1.45, 4.25) | < 0.001 |
| TyG-WC Index | |  |  |  |  |  |  |
| Q1 (0-25%) | 21/4580 | Reference |  | 1.51 (1.38, 1.64)  < 0.001 | Reference |  | 1.25 (1.12, 1.39)  < 0.001 |
| Q2 (25-50%) | 37/4546 | 1.82 (1.07, 3.11) | 0.028 | 1.10 (0.64, 1.90) | 0.732 |
| Q3 (50-75%) | 53/4510 | 2.66 (1.60, 4.40) | < 0.001 | 1.16 (0.68, 1.99) | 0.587 |
| Q4 (75-100%) | 88/4576 | 4.60 (2.86, 7.40) | < 0.001 | 1/62 (0.95, 2.76) | 0.077 |
| TyG-WHtR Index | |  |  |  |  |  |  |
| Q1 (0-25%) | 14/4570 | Reference |  | 7.47 (4.81, 11.6)  < 0.001 | Reference |  | 3.85 (2.24, 6.60)  < 0.001 |
| Q2 (25-50%) | 49/4548 | 3.57 (1.97, 6.47) | < 0.001 | 2.40 (1.31, 4.37) | 0.004 |
| Q3 (50-75%) | 50/4501 | 3.74 (2.07, 6.77) | < 0.001 | 1.03 (1.05, 3.54) | 0.034 |
| Q4 (75-100%) | 86/4493 | 6.63 (3.77, 11.7) | < 0.001 | 3.00 (1.66, 5.42) | < 0.001 |

1HR = Hazard Ratio, CI = Confidence Interval

Model 1: Unadjusted model.

Model 2: Adjusted for Age, Sex, Ethnicity, Education level, Townsend deprivation index, Alcohol consumption, Smoking status, diabetes history, and hypertension history.

**Supplementary Table 63** **Association between IR indices and CCVD incidence after excluding any events occurring within two years from the baseline.**

| Type | Cases/total sample size | Model 1 | | | Model 2 | | |
| --- | --- | --- | --- | --- | --- | --- | --- |
| HR1 (95% CI1) | P-value | P for trend | HR1 (95% CI1) | P-value | P for trend |
| TyG Index | |  |  |  |  |  |  |
| Q1 (0-25%) | 518/4453 | Reference |  | 2.90 (2.37, 3.55)  < 0.001 | Reference |  | 1.19 (0.96, 1.8)  0.112 |
| Q2 (25-50%) | 587/4423 | 1.17 (1.04, 1.31) | 0.010 | 1.00 (0.89, 1.13) | 0.992 |
| Q3 (50-75%) | 719/4406 | 1.45 (1.29, 1.62) | < 0.001 | 1.11 (0.99, 1.25) | 0.071 |
| Q4 (75-100%) | 777/4349 | 1.63 (1.46, 1.82) | < 0.001 | 1.07 (0.96, 1.21) | 0.223 |
| TyG-BMI Index | |  |  |  |  |  |  |
| Q1 (0-25%) | 476/4454 | Reference |  | 1,74 (1.62, 1.86)  < 0.001 | Reference |  | 1.35 (1.25, 1.47)  < 0.001 |
| Q2 (25-50%) | 583/4413 | 1.25 (1.11, 1.41) | < 0.001 | 1.00 (0.88, 1.13) | 0.981 |
| Q3 (50-75%) | 656/4405 | 1.44 (1.28, 1.62) | < 0.001 | 1.01 (0.89, 1.14) | 0.884 |
| Q4 (75-100%) | 886/4359 | 2.04 (1.82, 2.28) | < 0.001 | 1.29 (1.14, 1.45) | < 0.001 |
| TyG-WC Index | |  |  |  |  |  |  |
| Q1 (0-25%) | 404/4500 | Reference |  | 1.31 (1.28, 1.35)  < 0.001 | Reference |  | 1.13 (1.10, 1.17)  < 0.001 |
| Q2 (25-50%) | 552/4422 | 1.44 (1.26, 1.63) | < 0.001 | 1.08 (0.95, 1.24) | 0.232 |
| Q3 (50-75%) | 675/4381 | 1.83 (1.61, 2.07) | < 0.001 | 1.13 (0.99, 1.29) | 0.069 |
| Q4 (75-100%) | 970/4308 | 2.83 (2.52, 3.18) | < 0.001 | 1.45 (1.27, 1.66) | < 0.001 |
| TyG-WHtR Index | |  |  |  |  |  |  |
| Q1 (0-25%) | 432/4486 | Reference |  | 3.68 (3.24, 4.19)  < 0.001 | Reference |  | 1.92 (1.65， 2.24)  < 0.001 |
| Q2 (25-50%) | 572/4450 | 1.38 (1.21, 1.56) | < 0.001 | 1.05 (0.92, 1.19) | 0.466 |
| Q3 (50-75%) | 663/4381 | 1.67 (1.48, 1.88) | < 0.001 | 1.07 (0.94, 1.21) | 0.301 |
| Q4 (75-100%) | 934/4308 | 2.48 (2.22, 2.78) | < 0.001 | 1.39 (1.22, 1.57) | < 0.001 |

1HR = Hazard Ratio, CI = Confidence Interval

Model 1: Unadjusted model.

Model 2: Adjusted for Age, Sex, Ethnicity, Education level, Townsend deprivation index, Alcohol consumption, Smoking status, diabetes history, and hypertension history.

**Supplementary Table 64** **Association between IR indices and CCVD related mortality after excluding any events occurring within two years from the baseline.**

| Type | Cases/total sample size | Model 1 | | | Model 2 | | |
| --- | --- | --- | --- | --- | --- | --- | --- |
| HR1 (95% CI1) | P-value | P for trend | HR1 (95% CI1) | P-value | P for trend |
| TyG Index | |  |  |  |  |  |  |
| Q1 (0-25%) | 29/4453 | Reference |  | 4.66 (2.22, 9.78)  < 0.001 | Reference |  | 1.41 (0.64, 3.09)  0.394 |
| Q2 (25-50%) | 44/4423 | 1.56 (0.97, 2.49) | 0.205 | 1.27 (0.79, 2.03) | 0.326 |
| Q3 (50-75%) | 61/4406 | 2.16 (1.39, 3.37) | < 0.001 | 1.47 (0.94, 2.30) | 0.091 |
| Q4 (75-100%) | 53/4349 | 1.94 (1.23, 3.05) | 0.004 | 1.13 (0.71, 1.79) | 0.616 |
| TyG-BMI Index | |  |  |  |  |  |  |
| Q1 (0-25%) | 18/4454 | Reference |  | 2.28 (1.81, 2.87)  < 0.001 | Reference |  | 1.80 (1.35, 2.40)  < 0.001 |
| Q2 (25-50%) | 50/4413 | 2.80 (1.63, 4.79) | < 0.001 | 1.98 (1.15, 3.40) | 0.014 |
| Q3 (50-75%) | 47/4405 | 2.66 (1.55, 4.58) | < 0.001 | 1.61 (0.93, 2.80) | 0.092 |
| Q4 (75-100%) | 72/4359 | 4.19 (2.50, 7.02) | < 0.001 | 2.36 (1.37, 4.05) | 0.002 |
| TyG-WC Index | |  |  |  |  |  |  |
| Q1 (0-25%) | 21/4500 | Reference |  | 1.50 (1.38, 1.64)  < 0.001 | Reference |  | 1.24 (1.11, 1.38)  < 0.001 |
| Q2 (25-50%) | 35/4422 | 1.73 (1.01， 2.97) | 0.047 | 1.04 (0.60, 1.81) | 0.893 |
| Q3 (50-75%) | 48/4381 | 2.43 (1.45， 4.05) | < 0.001 | 1.04 (0.60, 1.80) | 0.876 |
| Q4 (75-100%) | 83/4308 | 4.39 (2.72, 7.09) | < 0.001 | 1.52 (0.89, 2.61) | 0.127 |
| TyG-WHtR Index | |  |  |  |  |  |  |
| Q1 (0-25%) | 14/4486 | Reference |  | 7.61 (4.84, 12.0)  < 0.001 | Reference |  | 3.79 (2.17, 6.62)  < 0.001 |
| Q2 (25-50%) | 46/4450 | 3.36 (1.85， 6.12) | < 0.001 | 2.24 (1.22, 4.10) | 0.009 |
| Q3 (50-75%) | 44/4381 | 3.31 (1.81， 6.04) | < 0.001 | 1.67 (0.90, 3.10) | 0.102 |
| Q4 (75-100%) | 83/4308 | 6.49 (3.86， 11.4) | < 0.001 | 2.88 (1.59, 5.22) | < 0.001 |

1HR = Hazard Ratio, CI = Confidence Interval

Model 1: Unadjusted model.

Model 2: Adjusted for Age, Sex, Ethnicity, Education level, Townsend deprivation index, Alcohol consumption, Smoking status, diabetes history, and hypertension history.

**Supplementary Table 65** **Association between IR indices and CVD related incidence after excluding any events occurring within one years from the baseline.**

| Type | Cases/total sample size | Model 1 | | | Model 2 | | |
| --- | --- | --- | --- | --- | --- | --- | --- |
| HR1 (95% CI1) | P-value | P for trend | HR1 (95% CI1) | P-value | P for trend |
| TyG Index | |  |  |  |  |  |  |
| Q1 (0-25%) | 530/4561 | Reference |  | 2.96 (2.42, 3.62)  < 0.001 | Reference |  | 1.21 (0.98, 1.49)  0.084 |
| Q2 (25-50%) | 608/4531 | 1.18 (1.05, 1.32) | 0.006 | 1.01 (0.90, 1.13) | 0.879 |
| Q3 (50-75%) | 731/4526 | 1.43 (1.28, 1.60) | < 0.001 | 1.10 (0.98, 1.23) | 0.103 |
| Q4 (75-100%) | 806/4496 | 1.65 (1.47, 1.84) | < 0.001 | 1.08 (0.96, 1.21) | 0.192 |
| TyG-BMI Index | |  |  |  |  |  |  |
| Q1 (0-25%) | 480/4550 | Reference |  | 1.77 (1.65, 1.89)  < 0.001 | Reference |  | 1.37 (1.27, 1.49)  < 0.001 |
| Q2 (25-50%) | 600/4535 | 1.27 (1.13, 1.44) | < 0.001 | 1.01 (0.90, 1.14) | 0.828 |
| Q3 (50-75%) | 678/4527 | 1.47 (1.31, 1.65) | < 0.001 | 1.03 (0.91, 1.16) | 0.672 |
| Q4 (75-100%) | 917/4502 | 2.08 (1.86, 2.32) | < 0.001 | 1.30 (1.16, 1.47) | < 0.001 |
| TyG-WC Index | |  |  |  |  |  |  |
| Q1 (0-25%) | 401/4550 | Reference |  | 1.32 (1.29, 1.36)  < 0.001 | Reference |  | 1.14 (1.11, 1.17)  < 0.001 |
| Q2 (25-50%) | 561/4546 | 1.47 (1.29, 1.67) | < 0.001 | 1.10 (0.97, 1.26) | 0.140 |
| Q3 (50-75%) | 705/4510 | 1.91 (1.69, 2.16) | < 0.001 | 1.18 (1.03, 1.34) | 0.013 |
| Q4 (75-100%) | 1008/4478 | 2.93 (2.61, 3.29) | < 0.001 | 1.50 (1.31, 1.71) | < 0.001 |
| TyG-WHtR Index | |  |  |  |  |  |  |
| Q1 (0-25%) | 433/4570 | Reference |  | 3.80 (3.35, 4.32)  < 0.001 | Reference |  | 1.98 (1.70, 2.31)  < 0.001 |
| Q2 (25-50%) | 581/4548 | 1.39 (1.23, 1.57) | < 0.001 | 1.06 (0.93, 1.20) | 0.397 |
| Q3 (50-75%) | 685/4501 | 1.71 (1.51, 1.93) | < 0.001 | 1.09 (0.96, 1.240 | 0.169 |
| Q4 (75-100%) | 976/4495 | 2.57 (2.29, 2.88) | < 0.001 | 1.43 (1.26, 1.61) | < 0.001 |

1HR = Hazard Ratio, CI = Confidence Interval

Model 1: Unadjusted model.

Model 2: Adjusted for Age, Sex, Ethnicity, Education level, Townsend deprivation index, Alcohol consumption, Smoking status, diabetes history, and hypertension history.

**Supplementary Table 66** **Association between IR indices and CVD related mortality after excluding any events occurring within one years from the baseline.**

| Type | Cases/total sample size | Model 1 | | | Model 2 | | |
| --- | --- | --- | --- | --- | --- | --- | --- |
| HR1 (95% CI1) | P-value | P for trend | HR1 (95% CI1) | P-value | P for trend |
| TyG Index | |  |  |  |  |  |  |
| Q1 (0-25%) | 20/4561 | Reference |  | 5.23 (2.56, 10.7)  < 0.001 | Reference |  | 2.71 (1.11, 6.62)  0.029 |
| Q2 (25-50%) | 37/4531 | 1.82 (1.02, 3.23) | 0.043 | 1.49 (0.84, 2.67) | 0.174 |
| Q3 (50-75%) | 49/4526 | 2.50 (1.44, 4.32) | 0.001 | 1.70 (0.98, 2.96) | 0.059 |
| Q4 (75-100%) | 50/4496 | 2.69 (1.56, 4.63) | < 0.001 | 1.51 (0.86, 2.64) | 0.147 |
| TyG-BMI Index | |  |  |  |  |  |  |
| Q1 (0-25%) | 11/4550 | Reference |  | 2.24 (1.79, 2.81)  < 0.001 | Reference |  | 2.02 (1.44, 2.83)  < 0.001 |
| Q2 (25-50%) | 42/4535 | 3.62 (1.79, 7.29) | < 0.001 | 2.54 (1.26, 5.15) | 0.009 |
| Q3 (50-75%) | 38/4527 | 3.66 (1.81, 7.37) | < 0.001 | 2.18 (1.07, 4.44) | 0.031 |
| Q4 (75-100%) | 65/4502 | 6.02 (3.08, 11.8) | < 0.001 | 3,20 (1.60, 6.43) | 0.001 |
| TyG-WC Index | |  |  |  |  |  |  |
| Q1 (0-25%) | 11/4550 | Reference |  | 1.51 (1.38, 1.64）  < 0.001 | Reference |  | 1.34 (1.19, 1.52)  < 0.001 |
| Q2 (25-50%) | 30/4546 | 2.48 (1.19, 5.18) | 0.016 | 1.42 (0.67, 3.02) | 0.357 |
| Q3 (50-75%) | 44/4510 | 4.41 (2.21, 8.79) | < 0.001 | 1.79 (0.87, 3.69) | 0.116 |
| Q4 (75-100%) | 71/4478 | 7.00 (3.60, 13.6) | < 0.001 | 2.14 (1.04, 4.43) | 0.040 |
| TyG-WHtR Index | |  |  |  |  |  |  |
| Q1 (0-25%) | 7/4570 | Reference |  | 7.47 (4.81, 11.6)  < 0.001 | Reference |  | 5.53 (2.90, 10.5)  < 0.001 |
| Q2 (25-50%) | 38/4548 | 5.62 (2.35, 13.4) | < 0.001 | 3.55 (1.48, 8.53) | 0.006 |
| Q3 (50-75%) | 40/4501 | 6.46 (2.73, 15.3) | < 0.001 | 3.14 (1.31, 7.55) | 0.010 |
| Q4 (75-100%) | 71/4495 | 11.5 (4.98, 26.6) | < 0.001 | 4.75 (2.00, 11.3) | < 0.001 |

1HR = Hazard Ratio, CI = Confidence Interval

Model 1: Unadjusted model.

Model 2: Adjusted for Age, Sex, Ethnicity, Education level, Townsend deprivation index, Alcohol consumption, Smoking status, diabetes history, and hypertension history.

**Supplementary Table 67** **Association between IR indices and CVD related incidence after excluding any events occurring within two years from the baseline.**

| Type | Cases/total sample size | Model 1 | | | Model 2 | | |
| --- | --- | --- | --- | --- | --- | --- | --- |
| HR1 (95% CI1) | P-value | P for trend | HR1 (95% CI1) | P-value | P for trend |
| TyG Index | |  |  |  |  |  |  |
| Q1 (0-25%) | 496/4455 | Reference |  | 2.93 (2.38, 3.60)  < 0.001 | Reference |  | 1.21 (0.97, 1.50)  0.093 |
| Q2 (25-50%) | 565/4425 | 1.17 (1.04, 1.32) | 0.010 | 1.00 (0.89, 1.13) | 0.948 |
| Q3 (50-75%) | 688/4408 | 1.45 (1.29, 1.62) | < 0.001 | 1.11 (0.99. 1.25) | 0.082 |
| Q4 (75-100%) | 743/4352 | 1.63 (1.45, 1.82) | < 0.001 | 1.07 (0.95, 1.21) | 0.240 |
| TyG-BMI Index | |  |  |  |  |  |  |
| Q1 (0-25%) | 452/4454 | Reference |  | 1.77 (1.65, 1.89)  < 0.001 | Reference |  | 1.38 (1.27, 1.50)  < 0.001 |
| Q2 (25-50%) | 556/4416 | 1.26 (1.11, 1.42) | < 0.001 | 1.00 (0.88, 1.13) | > 0.999 |
| Q3 (50-75%) | 632/4408 | 1.46 (1.29, 1.64) | < 0.001 | 1.02 (0.90, 1.16) | 0.739 |
| Q4 (75-100%) | 852/4362 | 2.06 (1.84, 2.31) | < 0.001 | 1.30 (1.15, 1.47) | < 0.001 |
| TyG-WC Index | |  |  |  |  |  |  |
| Q1 (0-25%) | 382/4501 | Reference |  | 1.32 (1.29, 1.35)  < 0.001 | Reference |  | 1.14 (1.10, 1.17)  < 0.001 |
| Q2 (25-50%) | 529/4445 | 1.46 (1.28, 1.66) | < 0.001 | 1.10 (0.96, 1.26) | 0.173 |
| Q3 (50-75%) | 648/4483 | 1.85 (1.63, 2.10) | < 0.001 | 1.15 (1.00, 1.32) | 0.043 |
| Q4 (75-100%) | 933/4311 | 2.87 (2.55, 3.24) | < 0.001 | 1.48 (1.29, 1.70) | < 0.001 |
| TyG-WHtR Index | |  |  |  |  |  |  |
| Q1 (0-25%) | 410/4486 | Reference |  | 3.77 (3.31, 4.30)  < 0.001 | Reference |  | 1.99 (1.70, 2.33)  < 0.001 |
| Q2 (25-50%) | 545/4453 | 1.38 (1.21, 1.57) | < 0.001 | 1.05 (0.92, 1.200 | 0.459 |
| Q3 (50-75%) | 639/4371 | 1.69 (1.49, 1.91) | < 0.001 | 1.08 (0.96, 1.23) | 0.216 |
| Q4 (75-100%) | 898/4330 | 2.52 (2.24, 2.83) | < 0.001 | 1.41 (1.24, 1.60) | < 0.001 |

1HR = Hazard Ratio, CI = Confidence Interval

Model 1: Unadjusted model.

Model 2: Adjusted for Age, Sex, Ethnicity, Education level, Townsend deprivation index, Alcohol consumption, Smoking status, diabetes history, and hypertension history.

**Supplementary Table 68** **Association between IR indices and CVD related mortality after excluding any events occurring within two years from the baseline.**

| Type | Cases/total sample size | Model 1 | | | Model 2 | | |
| --- | --- | --- | --- | --- | --- | --- | --- |
| HR1 (95% CI1) | P-value | P for trend | HR1 (95% CI1) | P-value | P for trend |
| TyG Index | |  |  |  |  |  |  |
| Q1 (0-25%) | 20/4455 | Reference |  | 3.77 93.31, 4.30)  < 0.001 | Reference |  | 2.28 (0.90, 5.76)  0.082 |
| Q2 (25-50%) | 35/4425 | 1.71 (0.95, 3.06) | 0.073 | 1.39 (0.77, 2.49) | 0.275 |
| Q3 (50-75%) | 46/4408 | 2.33 (1.34, 4.36) | 0.003 | 1.56 (0.89, 2.73) | 0.117 |
| Q4 (75-100%) | 47/4352 | 2.52 (1.46, 4.38) | < 0.001 | 1.39 (0.79, 2.45) | 0.250 |
| TyG-BMI Index | |  |  |  |  |  |  |
| Q1 (0-25%) | 11/4454 | Reference |  | 2.45 (1.87, 3.20)  < 0.001 | Reference |  | 2.04 (1.44, 2.28)  < 0.001 |
| Q2 (25-50%) | 38/4416 | 3.22 (1.59, 6.56) | 0.001 | 2.27 (1.11, 4.63) | 0.025 |
| Q3 (50-75%) | 36/4408 | 3.47 (1.71, 7.02) | < 0.001 | 2.05 (1.00, 4.19) | 0.049 |
| Q4 (75-100%) | 63/4362 | 5.86 (2.99, 11.5) | < 0.001 | 3.10 (1.54, 6.23) | 0.002 |
| TyG-WC Index | |  |  |  |  |  |  |
| Q1 (0-25%) | 11/4501 | Reference |  | 1.62 (1.46, 1.79)  < 0.001 | Reference |  | 1.34 9.18, 1.53)  < 0.001 |
| Q2 (25-50%) | 28/4445 | 2.28 (1.08, 4.81) | 0.031 | 1.31 (0.61, 2.81) | 0.486 |
| Q3 (50-75%) | 40/4483 | 4.02 (2.01, 8.08) | < 0.001 | 1.64 (0,79, 3.40) | 0.187 |
| Q4 (75-100%) | 69/4311 | 6.87 (3.52, 13.4) | < 0.001 | 2.11 (1.02, 4.39) | 0.045 |
| TyG-WHtR Index | |  |  |  |  |  |  |
| Q1 (0-25%) | 7/4486 | Reference |  | 10.4 (6.10, 17.6)  < 0.001 | Reference |  | 5.71 (2.94, 11.1)  < 0.001 |
| Q2 (25-50%) | 36/4453 | 5.29 (2.21, 12.7) | < 0.001 | 3.32 (1.38, 8.01) | 0.008 |
| Q3 (50-75%) | 36/4371 | 5.79 (2.43, 13.8) | < 0.001 | 2.80 (1.16, 6.77) | 0.023 |
| Q4 (75-100%) | 69/4330 | 11.3 (4.88, 26.1) | < 0.001 | 4.1 (1.94, 11.0) | < 0.001 |

1HR = Hazard Ratio, CI = Confidence Interval

Model 1: Unadjusted model.

Model 2: Adjusted for Age, Sex, Ethnicity, Education level, Townsend deprivation index, Alcohol consumption, Smoking status, diabetes history, and hypertension history.

| Type | Cases/total sample size | Model 1 | | | Model 2 | | |
| --- | --- | --- | --- | --- | --- | --- | --- |
| HR1 (95% CI1) | P-value | P for trend | HR1 (95% CI1) | P-value | P for trend |
| TyG Index | |  |  |  |  |  |  |
| Q1 (0-25%) | 195/4573 | Reference |  | 2.55 (1.82, 3.59)  < 0.001 | Reference |  | 0.88 (0.61, 1.25)  0.470 |
| Q2 (25-50%) | 227/4556 | 1.19 (0.98, 1.44) | 0.077 | 0.98 (0.81, 1.19) | 0.875 |
| Q3 (50-75%) | 246/4558 | 1.29 (1.07, 1.56) | 0.008 | 0.95 (0.79, 1.15) | 0.614 |
| Q4 (75-100%) | 267/4538 | 1.44 (1.20, 1.73) | < 0.001 | 0.87 (0.71,l 1.05) | 0.142 |
| TyG-BMI Index | |  |  |  |  |  |  |
| Q1 (0-25%) | 174/4562 | Reference |  | 2.03 (1.82, 2.26)  < 0.001 | Reference |  | 1.52 (1.33, 1.73)  < 0.001 |
| Q2 (25-50%) | 189/4561 | 1.09 (0.89, 1.34) | 0.400 | 0.87 (0.71, 1.07) | 0.197 |
| Q3 (50-75%) | 214/4558 | 1.25 (1.02, 1.53) | 0.028 | 0.86 (0.70, 1.06) | 0.156 |
| Q4 (75-100%) | 356/4544 | 2.16 (1.80, 2.58) | < 0.001 | 1.25 (1.03, 1.52) | 0.025 |
| TyG-WC Index | |  |  |  |  |  |  |
| Q1 (0-25%) | 139/4589 | Reference |  | 1.37 (1.32, 1.43)  < 0.001 | Reference |  | 1.18 (1.12, 1.24)  < 0.001 |
| Q2 (25-50%) | 182/4569 | 1.35 (1.08, 1.69) | 0.007 | 1.03 (0.82, 1.29) | 0.818 |
| Q3 (50-75%) | 243/4546 | 1.85 (1.50, 2.27) | < 0.001 | 1.13 (0.90, 1.41) | 0.288 |
| Q4 (75-100%) | 371/4521 | 2.94 (2.42, 3.58) | < 0.001 | 1.44 (1.15, 1.79) | 0.002 |
| TyG-WHtR Index | |  |  |  |  |  |  |
| Q1 (0-25%) | 156/4577 | Reference |  | 4.77 (3.86, 5.89)  < 0.001 | Reference |  | 2.26 (.76, 2.91)  < 0.001 |
| Q2 (25-50%) | 197/4578 | 1.29 (1.04, 1.59) | 0.018 | 0.98 (0.79, 1.22) | 0.871 |
| Q3 (50-75%) | 208/4529 | 1.40 (1.14, 1.72) | 0.002 | 0.86 (0.70, 1.07) | 0.188 |
| Q4 (75-100%) | 374/4541 | 2.60 (2.16, 3.31) | < 0.001 | 1.31 (1.07, 1.61) | 0.009 |

**Supplementary Table 69** **Association between IR indices and heart failure related incidence after excluding any events occurring within one years from the baseline.**

1HR = Hazard Ratio, CI = Confidence Interval

Model 1: Unadjusted model.

Model 2: Adjusted for Age, Sex, Ethnicity, Education level, Townsend deprivation index, Alcohol consumption, Smoking status, diabetes history, and hypertension history.

**Supplementary Table 70** **Association between IR indices and heart failure related incidence after excluding any events occurring within two years from the baseline.**

| Type | Cases/total sample size | Model 1 | | | Model 2 | | |
| --- | --- | --- | --- | --- | --- | --- | --- |
| HR1 (95% CI1) | P-value | P for trend | HR1 (95% CI1) | P-value | P for trend |
| TyG Index | |  |  |  |  |  |  |
| Q1 (0-25%) | 189/4493 | Reference |  | 2.43 (1.72, 3.45)  < 0.001 | Reference |  | 0.83 (0.57, 1.19)  0.306 |
| Q2 (25-50%) | 215/4480 | 1.16 (0.96, 1.41) | 0.132 | 0.96 (0.79, 1.17) | 0.681 |
| Q3 (50-75%) | 239/4469 | 1.29 (1.07, 1.56) | 0.008 | 0.95 (0.79, 1.16) | 0.626 |
| Q4 (75-100%) | 2534431 | 1.41 (1.17, 1.70) | < 0.001 | 0.84 (0.69, 1.03) | 0.091 |
| TyG-BMI Index | |  |  |  |  |  |  |
| Q1 (0-25%) | 169/4488 | Reference |  | 2.02 (1.81, 2.26)  < 0.001 | Reference |  | 1.50 (1.32, 1.72)  < 0.001 |
| Q2 (25-50%) | 180/4474 | 1.07 (0.87, 1.32) | 0.520 | 0.85 (0.69. 1.05) | 0.142 |
| Q3 (50-75%) | 205/4469 | 1.23 (1.01, 1.51) | 0.043 | 0.85 (0.69, 1.04) | 0.118 |
| Q4 (75-100%) | 342/4442 | 2.12 (1.77, 2.55) | < 0.001 | 1.23 (1.00, 1.50) | 0.046 |
| TyG-WC Index | |  |  |  |  |  |  |
| Q1 (0-25%) | 134/4424 | Reference |  | 1.37 (1.32, 1.43)  < 0.001 | Reference |  | 1.18 (1.12, 1.240  < 0.001 |
| Q2 (25-50%) | 175/4492 | 1.35 (1.08, 1.69) | 0.009 | 1.02 (0.81, 1.29) | 0.834 |
| Q3 (50-75%) | 230/4454 | 1.82 (1.47, 2.25) | < 0.001 | 1.11 (0.88, 1.39) | 0.377 |
| Q4 (75-100%) | 357/4403 | 2.95 (2.42, 3.59) | < 0.001 | 1.44 (1.14, 1.80) | 0.002 |
| TyG-WHtR Index | |  |  |  |  |  |  |
| Q1 (0-25%) | 150/4509 | Reference |  | 4.76 (3.83, 5.91)  < 0.001 | Reference |  | 2.24 (1.3, 2.90)  < 0.001 |
| Q2 (25-50%) | 190/4510 | 1.29 (1.04, 1.60) | 0.018 | 0.98 (0.79, 1.22) | 0.890 |
| Q3 (50-75%) | 196/4426 | 1.37 (1.11, 1.70) | 0.004 | 0.85 (0.68, 1.06) | 0.140 |
| Q4 (75-100%) | 360/4428 | 2.61 (2.16, 3.16) | < 0.001 | 1.32 (1.07,. 1.62) | 0.010 |

1HR = Hazard Ratio, CI = Confidence Interval

Model 1: Unadjusted model.

Model 2: Adjusted for Age, Sex, Ethnicity, Education level, Townsend deprivation index, Alcohol consumption, Smoking status, diabetes history, and hypertension history.

**Supplementary Table 71** **Association between IR indices and stroke related incidence after excluding any events occurring within one years from the baseline.**

| Type | Cases/total sample size | Model 1 | | | Model 2 | | |
| --- | --- | --- | --- | --- | --- | --- | --- |
| HR1 (95% CI1) | P-value | P for trend | HR1 (95% CI1) | P-value | P for trend |
| TyG Index | |  |  |  |  |  |  |
| Q1 (0-25%) | 133/4572 | Reference |  | 2.28 (1.51, 3.43)  < 0.001 | Reference |  | 1.04 (0.67, 1.61)  0.861 |
| Q2 (25-50%) | 153/4554 | 1.17 (0.93, 1.480 | 0.179 | 1.01 (0.80, 1.27) | 0.942 |
| Q3 (50-75%) | 170/4557 | 1.30 (1.04, 1.630 | 0.024 | 1.02 (0.81, 1.290 | 0.851 |
| Q4 (75-100%) | 192/4540 | 1.51 (1.21, 1.88) | < 0.001 | 1.04 (0.83, 1.31) | 0.723 |
| TyG-BMI Index | |  |  |  |  |  |  |
| Q1 (0-25%) | 136/4562 | Reference |  | 1.23 (1.06, 1.43)  0.006 | Reference |  | 0.89 (0.75, 1.06)  0.178 |
| Q2 (25-50%) | 168/4558 | 1.24 (0.99, 1.55) | 0.063 | 1.02 (0.81, 1.28) | 0.857 |
| Q3 (50-75%) | 164/4559 | 1.22 90.97, 1.53) | 0.086 | 0.89 (0.70, 1.12) | 0.316 |
| Q4 (75-100%) | 180/4544 | 1.36 (1.09, 1.70) | 0.007 | 0.86 (0.68 1/10) | 0.224 |
| TyG-WC Index | |  |  |  |  |  |  |
| Q1 (0-25%) | 118/4587 | Reference |  | 1.18 (1.13, 1.25)  < 0.001 | Reference |  | 1.02 (0.95, 1.08)  0.617 |
| Q2 (25-50%) | 156/4569 | 1.36 (1.07, 1.73) | 0.011 | 1.06 (0.83, 1.35) | 0.648 |
| Q3 (50-75%) | 163/4546 | 1.45 (1.14, 1.84) | 0.002 | 0.93 (0.72, 1.20) | 0.581 |
| Q4 (75-100%) | 211/4521 | 1.94 (1.55, 2.43) | .< 0.001 | 1.04 90.80, 1.35) | 0.774 |
| TyG-WHtR Index | |  |  |  |  |  |  |
| Q1 (0-25%) | 129/4575 | Reference |  | 2.28 (1.75, 2.97)  < 0.001 | Reference |  | 1.15 (0.84, 1.57)  0.390 |
| Q2 (25-50%) | 152/4576 | 1.20 (0.95, 151) | 0.131 | 0.94 (0.74, 1.20) | 0.635 |
| Q3 (50-75%) | 157/4529 | 1.27 (1.01, 1.60) | 0.044 | 0.86 (0.67, 1.09) | 0.208 |
| Q4 (75-100%) | 210/4543 | 1.74 (1.40, 2.17) | < 0.001 | 1.00 (0.79, 1.28) | 0.990 |

1HR = Hazard Ratio, CI = Confidence Interval

Model 1: Unadjusted model.

Model 2: Adjusted for Age, Sex, Ethnicity, Education level, Townsend deprivation index, Alcohol consumption, Smoking status, diabetes history, and hypertension history.

**Supplementary Table 72** **Association between IR indices and stroke related incidence after excluding any events occurring within two years from the baseline.**

| Type | Cases/total sample size | Model 1 | | | Model 2 | | |
| --- | --- | --- | --- | --- | --- | --- | --- |
| HR1 (95% CI1) | P-value | P for trend | HR1 (95% CI1) | P-value | P for trend |
| TyG Index | |  |  |  |  |  |  |
| Q1 (0-25%) | 123/4480 | Reference |  | 2.47 (1.62, 3.76)  < 0.001 | Reference |  | 1.14 (0.73, 1.78)  0.575 |
| Q2 (25-50%) | 143/4480 | 1.19 (0.93, 1.51) | 0.164 | 1.02 (0.80, 1.30) | 0.862 |
| Q3 (50-75%) | 161/4469 | 1.33 (1.05, 1.68) | 0.017 | 1.05 (0.83, 1.33) | 0.695 |
| Q4 (75-100%) | 184/4436 | 1.57 (1.25, 1.97) | < 0.001 | 1.09 (0.86, 1.38) | 0.499 |
| TyG-BMI Index | |  |  |  |  |  |  |
| Q1 (0-25%) | 130/4486 | Reference |  | 1.23 (1.06, 1.44)  0.007 | Reference |  | 0.90 (0.75, 1.07)  0.225 |
| Q2 (25-50%) | 158/4472 | 1.22 (0.97, 1.54) | 0.094 | 1.01 (0.80, 1.27) | 0.961 |
| Q3 (50-75%) | 152/4469 | 1.18 (0.94, 1.50) | 0.158 | 0.86 (0.68, 1.10) | 0.230 |
| Q4 (75-100%) | 171/4450 | 1.36 (1.08, 1.70) | 0.009 | 0.86 (0.67, 1.10) | 0.240 |
| TyG-WC Index | |  |  |  |  |  |  |
| Q1 (0-25%) | 112/4520 | Reference |  | 1.18 (1.12, 1.24)  < 0.001 | Reference |  | 1.01, (0.95, 1.08)  0.687 |
| Q2 (25-50%) | 149/4491 | 1.37 (1.08, 1.76) | 0.011 | 1.07 (0.83, 1.37) | 0.614 |
| Q3 (50-75%) | 153/4457 | 1.44 (1.12, 1.83) | 0.004 | 0.92 (0.71, 1.20) | 0.541 |
| Q4 (75-100%) | 197/4405 | 1.92 (1.52, 2.42) | < 0.001 | 1.02 (0.78, 1.340 | 0.862 |
| TyG-WHtR Index | |  |  |  |  |  |  |
| Q1 (0-25%) | 123/4506 | Reference |  | 2.25 (1.71, 2.96)  < 0.001 | Reference |  | 1.14 90.83, 1.57)  0.429 |
| Q2 (25-50%) | 142/4507 | 1.17 (0.92, 1.50) | 0.191 | 0.93 (0.73, 1.19) | 0.550 |
| Q3 (50-75%) | 150/4429 | 1.28 (1.01, 1.62) | 0.045 | 0.86 (0.67, 1.10) | 0.236 |
| Q4 (75-100%) | 196/4431 | 1.71 (1.36, 2.140 | < 0.001 | 0.99 (0.77, 1.27) | 0.923 |

1HR = Hazard Ratio, CI = Confidence Interval

Model 1: Unadjusted model.

Model 2: Adjusted for Age, Sex, Ethnicity, Education level, Townsend deprivation index, Alcohol consumption, Smoking status, diabetes history, and hypertension history.
